1           **Specialization of actin isoforms derived from the loss of key**  
2                           **interactions with regulatory factors**

3  
4

5 Micaela Boiero Sanders<sup>1</sup>, Christopher P. Toret<sup>1</sup>, Adrien Antkowiak<sup>1</sup>, Robert C.  
6 Robinson<sup>2,3</sup> and Alphée Michelot<sup>1,\*</sup>

7  
8

9   <sup>1</sup> Aix Marseille Univ, CNRS, IBDM, Turing Centre for Living Systems, Marseille,  
10 France

11   <sup>2</sup> Research Institute for Interdisciplinary Science (RIIS), Okayama University,  
12 Okayama 700-8530, Japan.

13   <sup>3</sup> School of Biomolecular Science and Engineering (BSE), Vidyasirimedhi Institute of  
14 Science and Technology (VISTEC), Rayong 21210 Thailand.

15

16 \* [alphee.michelot@univ-amu.fr](mailto:alphee.michelot@univ-amu.fr)

17

18 **Keywords**

19 Actin-binding proteins / Actin cytoskeleton / Actin isoforms / Biomimetism /

20 *Saccharomyces cerevisiae*

21

22

23 68,914 characters

24

25 **Abstract**

26 A paradox of eukaryotic cells is that while some species assemble a complex actin  
27 cytoskeleton from a single ortholog, other species utilize a greater diversity of actin  
28 isoforms. The physiological consequences of using different actin isoforms, and the  
29 molecular mechanisms by which highly conserved actin isoforms are segregated into  
30 distinct networks, are poorly known. Here, we sought to understand how a simple  
31 biological system, composed of a unique actin and a limited set of actin-binding  
32 proteins, reacts to a switch to heterologous actin expression. Using yeast as a model  
33 system and biomimetic assays, we show that such perturbation causes drastic  
34 reorganization of the actin cytoskeleton. Our results indicate that defective interaction  
35 of a heterologous actin for important regulators of actin assembly limits certain actin  
36 assembly pathways while reinforcing others. Expression of two heterologous actin  
37 variants, each specialized in assembling a different network, rescues cytoskeletal  
38 organization and confers resistance to external perturbation. Hence, while species  
39 using a unique actin have homeostatic actin networks, actin assembly pathways in  
40 species using several actin isoforms may act more independently.

41

## 42 Introduction

43 A fundamental characteristic of eukaryotic cells is the existence of an organized actin  
44 cytoskeleton. Dynamic actin filaments are assembled into diverse architectures which  
45 co-exist within one cytoplasm, each of which is involved in the exertion of forces for  
46 various cellular functions (Blanchoin *et al*, 2014). Key partners are families of actin-  
47 binding proteins (ABPs), which interact with actin monomers and filaments to  
48 regulate cytoskeletal organization and dynamics (Moseley & Goode, 2006; Pollard,  
49 2016). Actin sequence is highly conserved across most eukaryotes, but while some  
50 cell types only express a single actin (for example yeasts), other cell types can  
51 express several similar actin isoforms (for example non-muscle mammalian cells  
52 express beta- and gamma-actins which are 99% identical), or even very different  
53 actin isoforms (for example, *Chlamydomonas reinhardtii* expresses two actins, IDA5  
54 and NAP1, which are only 65% identical) (Gunning *et al*, 2015; Boiero Sanders *et al*,  
55 2020). An extreme case is plants, which can express a multitude of actin isoforms  
56 (for example, *Zea mays* and *Arabidopsis thaliana* express 21 and 8 actin isoforms,  
57 respectively). Adding to this complexity, some actins can undergo partial post-  
58 translational modifications (PTMs), such as arginylation or acetylation, which modify  
59 their biochemical properties (A *et al*, 2020; Kashina, 2014; Boiero Sanders *et al*,  
60 2020).

61  
62 Hence, while a number of organisms are able to assemble a complex actin  
63 cytoskeleton from one (or a limited number) of actin isoforms, other organisms  
64 require the presence of multiple actin isoforms to generate such variability. In line  
65 with this idea, segregation of actin isoforms is observed *in vivo*. Results from different  
66 mammalian cell lines have found that beta-actin was located mainly in the contractile

67 ring, stress fibers, filopodia and cell-cell contacts while gamma-actin was localized  
68 primarily in the cortex and lamellipodia (Dugina *et al*, 2009; Chen *et al*, 2017). In  
69 *Arabidopsis thaliana*, the main vegetative actin isoforms organize into different  
70 structures in epidermal cells (Kijima *et al*, 2018). However, it should be noted that  
71 expression in mice of a beta-coded gamma-actin, where the nucleotide sequence of  
72 beta-actin is modified minimally to express gamma-actin, led to viable mice with no  
73 detectable change in behavior (Vedula *et al*, 2017). This result indicates that at least  
74 in some cases, the absence of an actin isoform can be compensated by the  
75 expression of a similar isoform.

76

77 A particular challenge for the field is to understand how small differences at the  
78 molecular level lead to a major segregation of actin isoforms at the cellular level. To  
79 decipher the underlying mechanisms, it is natural to postulate that actin isoforms  
80 bear small yet significant biochemical differences. Our knowledge of the distinctions  
81 between actins is limited to a small number of actin orthologs (mainly *S. cerevisiae*  
82 Act1p, rabbit muscle actin, to a lesser extent beta- and gamma-actins, *S. pombe*  
83 Act1p and plant actins). Nonetheless, these studies reveal notable differences in their  
84 biochemical properties (Nefsky & Bretscher, 1992; Kim *et al*, 1996; Buzan & Frieden,  
85 1996; Bryan & Rubenstein, 2005; Takaine & Mabuchi, 2007; Kijima *et al*, 2016), in  
86 their mechanical properties (Orlova *et al*, 2001; McCullough *et al*, 2011), and their  
87 ability to interact with the different actin-binding proteins (Nefsky & Bretscher, 1992;  
88 Eads *et al*, 1998; Takaine & Mabuchi, 2007; Ezezika *et al*, 2009; McCullough *et al*,  
89 2011; Kang *et al*, 2014; Kijima *et al*, 2016), including nucleation factors of actin  
90 assembly (Ti & Pollard, 2011; Chen *et al*, 2017). How such differences account for  
91 spatial segregation of actin isoforms on a cellular scale remains unclear.

92

93 In this work, we investigated, from a general perspective, the molecular principles by  
94 which actin isoforms can be addressed to different networks. Analysis in a model  
95 system, that exploits at least two actins to perform various actin functions, would  
96 explain a particular mechanism in a relevant physiological context. However, the  
97 importance of actin renders genetic manipulations difficult, and the inter-connection  
98 of actin networks in such models complicates cellular analysis. Mammalian systems  
99 in particular express many ABP isoforms, which makes interpretation of molecular  
100 mechanisms combinatorially challenging. Furthermore, co-expression of multiple  
101 actin isoforms makes endogenous purification as a single species difficult, although  
102 new powerful protocols have been developed in recent years for their expression and  
103 purification (Hatano *et al*, 2018, 2020). To overcome these limitations, we decided to  
104 adopt an alternative strategy, by determining the consequences of heterologous actin  
105 expression in a system normally using a single actin. With this approach, we aimed  
106 at measuring the consequences of a perturbation caused by the use of a different  
107 actin at the level of the cell and its cytoskeleton. We decided to use the well-studied  
108 organism, budding yeast, for the simplicity of its genetics. Another advantage of  
109 budding yeast is that actin assembles predominantly into two well-defined structures.  
110 These structures are actin patches, which are sites of endocytosis and where actin  
111 filaments are short and branched by the Arp2/3 complex, and actin cables, which are  
112 central for maintenance of cell polarity and intra-cellular trafficking, and where actin  
113 filaments are nucleated by the formin family of proteins (Moseley & Goode, 2006).  
114 Lastly, budding yeast allows for clean purification of ABPs in a defined organismal  
115 context.

116

117 Our results demonstrate that actin functions are regulated both at the nucleotide level  
118 where defects in actin expression leads to cell growth defects, and at the amino acid  
119 level where expression of heterologous actins induce a massive reorganization of the  
120 actin cytoskeleton. We demonstrate that actin isoforms are used with different  
121 efficiencies by the distinct actin assembly pathways, resulting in their targeting to  
122 particular actin structures. Finally, dissection of the underlying molecular mechanisms  
123 allows us to propose an explanation of our results, and a general model of the  
124 molecular mechanisms enabling segregation of actin isoforms in cells.

## 125 **Results**

### 126 **Generation of a library of yeast strains expressing a variety of actin orthologs**

127 We created a library of *S. cerevisiae* strains that express different actin orthologs to  
128 evaluate the consequences of actin variation on yeast actin cytoskeleton assembly.

129 In order to ensure that defects were not due to potential misfolding or non-functional  
130 actin, we selected a diversity of actins from other species rather than using directed  
131 mutations. This approach guarantees that the actin orthologs are functional in a  
132 biologically-relevant context, and maintain key physiological properties such as  
133 polymerization, depolymerization, nucleotide binding and hydrolysis.

134 We chose 122 different actins from species covering the entire eukaryotic  
135 phylogenetic tree for analysis (Table S1 and Fig. S1 A). We also computationally  
136 predicted ancestral sequences to extend the range of actin variant possibilities.  
137 Because the actin protein sequence is highly conserved across species, ancestral  
138 sequence reconstructions score with high confidence (Fig. S1 B). We obtained in  
139 total 223 actin sequences (including 101 ancestral actins), from which we selected 15  
140 for analysis. These actin orthologs were chosen to cover a spectrum from the most  
141 similar to wild-type *S. cerevisiae*'s actin (Act1p) to very divergent actin orthologs,  
142 which represent a wide range of identities (from 99 to 84%) (Fig. 1A and S1 B-C,  
143 Table 1), and to display differences across all domains of the actin fold (Fig. 1 B-C  
144 and S1C).

145 We synthesized the actin nucleotide sequences and sub-cloned them in a plasmid  
146 created specifically for rapid and robust actin gene replacement under endogenous  
147 promoter control in *S. cerevisiae* (Fig. S1D). With this strategy, we created a library  
148 of yeast strains, from which we systematically studied the effect of deleting the actin  
149 intron in haploid cells, changing the nucleotide sequence without modifying the final

150 actin protein in haploid cells, switching actin protein variants in haploid cells, and  
151 expressing copolymers of actin in diploid cells (Fig. 1 D).

152

153 Previous studies have demonstrated that the yeast actin intron is not essential for  
154 actin gene transcription and for normal cell growth (Ng *et al*, 1985). Indeed, our  
155 analysis found that an *act1* gene construct without the intron in *S. cerevisiae* S288C  
156 (ScNI) does not affect cell growth (Fig. S2 A and B) nor actin expression (Fig. S2 C  
157 and D). Fixation and phalloidin-labeling of the actin cytoskeleton reveals that the two  
158 main structures of actin filaments in yeast, actin patches and actin cables, are well-  
159 organized in yeast strains expressing actin in the absence of the intron and  
160 indistinguishable from wild type cells (Sc) (Fig S2, E-G). Therefore, all experiments  
161 presented in the following sections of this study were conducted on actins expressed  
162 in the absence of an intron.

163

#### 164 **Cell fitness tolerates reduced wild-type actin expression above a threshold**

165 We were concerned that small changes to the actin nucleotide sequence might have  
166 consequences on actin expression levels and cell viability (Hoekema *et al*, 1987;  
167 Zhou *et al*, 2016). In mammals, for instance, nucleotide sequence was shown to  
168 differentiate beta and gamma actin functions (Vedula *et al*, 2017). Therefore, we  
169 expressed wild-type actin from a range of different nucleotide sequences. We used  
170 coding sequences from other organisms, which we modified minimally so that the  
171 final product remained *S. cerevisiae*'s actin at the protein level (Table 1) (Fig. S2 H).  
172 Western blot analysis showed that silent mutations affect wild-type actin's expression  
173 level to various extents (Fig. 2, A and B), with a clear correlation between actin  
174 expression and the level of conservation of the nucleotide sequence (Fig. S2 I).



175 These data also revealed that a sizeable drop of actin expression (for example,  
176 Act\_Sc[Sp], derived from *S. pombe*'s actin gene, is expressed at 35% of normal  
177 level), has little or no effect on cell viability (Fig. 2, C-E and S2 J) nor on the  
178 organization (Fig. 2, F-H) or polarity (Fig. 2 I) of the actin cytoskeleton. However, a  
179 more drastic drop of actin expression (for example, Act\_Sc[At], derived from *A.*  
180 *thaliana*'s ACT8 gene, is expressed at 24% of normal level), affects visibly cell  
181 viability (Fig. 2, C-E and S2 J), the organization (Fig. 2, F-H) and the polarization  
182 (Fig. 2I) of the actin cytoskeleton. Expressing actin from a gene derived from the  
183 nucleotide sequence of *H. sapiens* ActB, whose nucleotide sequence is even less  
184 conserved, is lethal for cells. From these observations, we concluded that the level of  
185 expression levels of actin orthologs should be controlled carefully in this study.  
186 Nevertheless, these results also indicated that variations in actin expression down to  
187 a ~ 35% threshold generally have negligible effect on cell behavior.

188

### 189 **Actin amino acid sequence variations affect cell fitness and imbalance the** 190 **linear-to-branched actin network ratio**

191 We next focused our attention on the consequences of expressing heterologous actin  
192 orthologs in yeast cells. Actin genes were designed based on *S. cerevisiae*'s Act1  
193 sequence by making point mutations using yeast codon usage. Overall, all coding  
194 sequences used in this section are more than 90% identical to that of *S. cerevisiae*,  
195 which according to the previous section, lowers the risk that actin expression is  
196 reduced excessively. Nevertheless, we verified the expression level of each  
197 heterologous actin ortholog in haploid strains by western blotting. The expression  
198 level of each actin varied, and appeared not to be correlated with the evolutionary  
199 relationship (Fig. 3, A-B). For example, Act\_N1 was only expressed at 39% despite

200 having a 98.4% identity to wild-type actin and showed normal viability and  
201 cytoskeletal organization (Fig. 3, C-G).

202 While yeast strains expressing heterologous actin orthologs similar to *S. cerevisiae*  
203 wild-type actin (identity > 97%) grew well (Fig. 3, C-E), had normal cytoskeletal  
204 organization (Fig. 3, F-G) and were polarized normally (Fig. 3H), yeast strains  
205 expressing more distant actins (identity < 97%) showed moderate to severe defects  
206 (Fig. 3, C-H). The strength of the growth phenotypes correlated with the degree of  
207 conservation of the actin orthologs (Fig. 3E). Interestingly, consequences on the  
208 organization of the actin cytoskeleton was not the same for all mutants. While cells  
209 expressing Act\_N2 assembled, on average, an abnormally high number of actin  
210 patches, strains expressing Act\_Op or Act\_Ca assembled, on the contrary, a higher  
211 number of actin cables and few actin patches (Fig. 3, F-G, I). Considering that actin  
212 networks do not assemble independently in cells, but that homeostatic actin networks  
213 share a limited monomeric actin pool (Burke *et al*, 2014), the previous observation  
214 suggests an imbalanced assembly between branched- and linear-actin structures  
215 from the use of different actin variants. We hypothesized that the cellular machinery  
216 cannot use Act\_N2 efficiently to assemble actin cables, and cannot use Act\_Op or  
217 Act\_Ca to assemble actin patches, thus leading to an overproduction of patches in  
218 Act\_N2 cells and an overproduction of cables in Act\_Op and Act\_Ca cells. It is also  
219 possible that patch or cable assembly is boosted by the use of a particular actin  
220 ortholog, although this hypothesis seems less likely, since it is generally easier to  
221 disrupt a function than make it more efficient.

222 Following this hypothesis, we tested whether strains over-assembling actin patches  
223 would show acute resistance to Arp2/3 perturbations. This was the case, as the  
224 strain expressing Act\_N2 showed persistence of actin patches on treatment with the

225 small molecule inhibitor of the Arp2/3 complex CK-666 (Fig. 3J,K). Conversely,  
226 Act\_Op and Act\_Ca strains were more sensitive to CK-666. These results indicate  
227 that strains with increased branched network are buffered against Arp2/3  
228 perturbations.

229

### 230 **A biomimetic assay recapitulates actin ortholog preference for branched- or** 231 **linear-network assembly**

232 We then aimed to understand the molecular principles that allow different actin  
233 ortholog to be assembled specifically to certain actin networks, and hypothesized that  
234 heterologous actin orthologs may bind defectively to certain ABPs of *S. cerevisiae*.  
235 Because actin assembly into patches and cables involves a large number of proteins  
236 in cells, we adopted a reductionist approach based on a reconstituted assay. We  
237 considered that the subset of ABPs that are most essential for actin patch or cable  
238 assembly *in vivo*. Beyond formins and the Arp2/3 complex, these proteins include:  
239 profilin, a small globular protein that favors formin assembly, capping protein, a  
240 heterodimer that binds to barbed ends, ADF/cofilin, a small protein that promotes the  
241 disassembly of actin filaments, and tropomyosin, a helical coiled-coil protein that  
242 binds and stabilizes linear-actin filaments nucleated by formins (Moseley & Goode,  
243 2006; Pollard, 2016).

244 In addition to wild-type actin, we purified Act\_N2 and Act\_Ca from cultures of the  
245 corresponding yeast strains. We reconstituted *in vitro*, in a common experimental  
246 environment, branched- and linear-actin network assembly, respectively from formin-  
247 and WASp-coated beads (Antkowiak *et al*, 2019). First, we assessed the capabilities  
248 of the three actin orthologs to assemble into such networks. Act\_Ca assembled only  
249 into linear-actin networks (Fig. 4A), providing explanation for the inability of Act\_Ca

250 cells to assemble actin patches. However, Act\_N2 assembled both into branched-  
251 and linear-actin networks similarly to the control condition. We therefore  
252 hypothesized that an ABP, involved in the stabilization or disassembly of one of  
253 those actin networks, may bind abnormally. We labeled ADF/cofilin, which is known  
254 to promote branched-network disassembly by inducing Arp2/3 debranching while  
255 stabilizing linear-networks (Michelot *et al*, 2007; Chan *et al*, 2009). ADF/cofilin bound  
256 to linear-actin networks with higher affinity than to the branched-actin networks (Fig.  
257 4B), as previously reported (Gressin *et al*, 2015). However, ADF/cofilin bound  
258 similarly to both actin variants, albeit with reduced affinity compared to wild-type actin  
259 (Fig. 4B). We next labeled tropomyosin, which inhibits branched-network assembly  
260 and promotes linear-network stabilization (Blanchoin *et al*, 2001; Bernstein &  
261 Bamburg, 1982; DesMarais *et al*, 2002; Antkowiak *et al*, 2019). Tropomyosin bound  
262 with higher efficiency to linear-actin networks, as expected (Fig. 4C). Its binding to  
263 Act1p and Act\_Ca was similar; however, tropomyosin was completely absent from  
264 actin networks assembled from Act\_N2 (Fig. 4C). This inability to bind to Act\_N2  
265 provides a likely explanation why actin patch assembly is favored in Act\_N2 cells.

266

### 267 **Structural analysis provides plausible explanation of defective interactions**

268 We searched for a structural understanding of why Act\_N2 and Act\_Ca do not  
269 interact properly with specific ABPs of *S. cerevisiae*. Based on the structural  
270 information available of the interactions of actin with its binding partners, we identified  
271 actin residues that are within 5 Å of at the actin-actin interface in a filament, or at the  
272 interface between G- or F-actin and the ABPs used in our biomimetic assay (Winn *et*  
273 *al*, 2011), with the exception of the Arp2/3 mother filament which were within 10 Å

274 since the coordinates were not released when this study was performed (Fäßler *et al*,  
275 2020) (Fig. 5A).

276 At protomer:protomer interfaces, wild-type actin differed by one residue (Val287Met)  
277 and two residues (Ala167Glu and Ser170Ala) relative to Act\_Ca and Act\_N2,  
278 respectively (Fig. 5B). In particular, the Ala167Glu substitution has been shown to  
279 effect actin filament stiffness (Hocky *et al*, 2016; Kang *et al*, 2012; Scipion *et al*,  
280 2018). Furthermore, four differences were observed in inter-strand contacts relative  
281 to Sc (Ser194Thr and Glu270Asp for Act\_N2) and (Ser201Thr and Thr203Ser for  
282 Act\_Ca) (Fig. 5B). Together, these substitutions may subtly alter the relative filament  
283 plasticity, which in turn may have an influence on the association or activity of  
284 filament binding and filament nucleating proteins (McCullough *et al*, 2011; von der  
285 Ecken *et al*, 2015). In addition, we identified 15 non-conserved residues of Act\_N2 or  
286 Act\_Ca that are surface exposed on the actin protomer structures and contact a  
287 binding partner (Table 2). Tropomyosin is likely to be particularly susceptible to small  
288 changes in the actin filaments, since it loosely associates with the actin filament  
289 surface via shape and charge complementarity (Popp & Robinson, 2012; von der  
290 Ecken *et al*, 2016). Particularly, Act\_N2 filament Asp311 potentially places the  
291 negative charge at  $\sim 1.5$  Å closer to the actin, relative to the Sc and Ca filaments  
292 (glutamic acid), which may be inappropriate for tropomyosin binding. Act\_N2 has  
293 substitutions in interfaces with all the proteins used in the *in vitro* assays, including  
294 Arp2/3 and formin interfaces, which could have impaired the activities of these  
295 filament nucleating complexes. Act\_Ca has fewer substitutions in the actin regulating  
296 proteins, with the notable exception of Arp2/3. In particular, substitutions in the actin  
297 interfaces with Arp2/3 subunits in the daughter filament may indicate that the

298 nucleation process of the daughter filament is impaired for Act\_Ca with *S.*  
299 *cerevisiae*'s Arp2/3.

300

### 301 **Dual expression of a patch and a cable-favoring actin rescues cell viability and** 302 **cytoskeletal organization**

303 The identification of heterologous actin orthologs favoring the specific assembly of  
304 actin patches or cables suggested that actin functions could be separated from the  
305 use of two carefully selected actin variants (Fig. 6A). To test this possibility, we  
306 switched to a diploid yeast cell background. We verified first that both Act\_N2/Act\_N2  
307 and Act\_Ca/Act\_Ca cells display similar phenotypes to their haploid equivalents, with  
308 slow growth and unbalanced actin patch and cable assembly (Fig. 6B-C). We then  
309 crossed strains in order to express a copy of each actin variant in the same cell.  
310 Strikingly, cell growth (Fig. 6B-C), actin cytoskeleton organization (Fig. 6D-E) and cell  
311 polarity (Fig. 6F) were rescued in diploid cells expressing both Act\_N2 and Act\_Ca.  
312 Verification that each of the actin structures was enriched by each of the variants is  
313 difficult to do in the absence of specific antibodies; nevertheless, our results indicate  
314 that defective actin functions in cells carrying a single actin variant were carried out  
315 more normally when the other actin variant was simultaneously expressed.

316

### 317 **F-actin network homeostasis is affected in a two-actin system**

318 Generation of yeast strains with partially separated actin functions enabled us to  
319 question some differences between species sharing a single actin for multiple cellular  
320 functions, and species using different actin variants. We were especially curious to  
321 know what the physiological consequences would be on actin network homeostasis  
322 for wild type diploid cells and Act\_N2/Act\_Ca cells, which share the same ratio of

323 branched and linear network but possess different actin variants. As expected,  
324 addition of CK-666 in wild-type cells resulted in the disappearance of actin patches  
325 and an increase of actin cables (Fig. 6G-H). On the contrary, addition of CK-666 to  
326 Act\_N2/Act\_Ca cells had a weaker effect, as a large number of actin patches could  
327 still be observed (Fig. 6G-H). Together, these results show that while F-actin network  
328 homeostasis is preserved in a yeast strain using a single actin ortholog, actin re-  
329 distribution from one network to another is less effective in the context of a yeast  
330 strain expressing two different actin variants.

331

332

## 333 **Discussion**

### 334 **Identification of actin variants that favor branched- or linear-actin networks** 335 **assembly**

336 Here we investigated, at the cellular and at the molecular level, the consequences of  
337 perturbing a simple system which uses a single actin ortholog and a limited number  
338 of regulatory proteins to assemble an organized actin cytoskeleton. We  
339 demonstrated that small variations in the actin sequence are sufficient to induce a  
340 global reorganization of the actin cytoskeleton. This finding highlights the fact that,  
341 despite the remarkably high sequence conservation of actin orthologs across  
342 species, there are sufficient differences in sequence for cells to segregate multiple  
343 actin variants into diverse actin networks.

344 Generally, we found that mutant cells expressing a heterologous actin assemble an  
345 abnormal distribution of actin patches and cables. This result is coherent with the  
346 literature, which shows particularly in yeast that homeostatic actin networks compete  
347 for a limited pool of actin monomers (Burke *et al*, 2014) (Fig. 7 top and bottom left). In

348 this context, it is rational to postulate that the inability of an actin variant to assemble  
349 efficiently in a given actin network, leads to an expansion of the other actin networks,  
350 provided that those can use this actin normally (Fig. 7 top middle).

351

352 The possibility to rescue yeast cell viability with the simultaneous expression of  
353 patch-favoring and cable-favoring actin variants, reinforces the possibility that actin  
354 isoforms compensate for the other actin's lack of efficiency to form a certain structure  
355 (Fig. 7 top right). The lack of specific probes that can differentiate between these  
356 actin variants prevented us from localizing them in cells and from verifying the extent  
357 of segregation. We expect the integration of an actin variant within a particular  
358 network to be dependent on its innate ability to assemble in such a network, and also  
359 to be affected by relative efficiencies of other co-expressed actin variants to integrate  
360 within branched- and linear- actin networks. Such a hypothesis is purely speculative  
361 and should be formally tested in the future. Nevertheless, our observations strongly  
362 suggest that we were successful in performing a partial separation of function, and in  
363 transforming yeast from being an organism that uses a single actin into an organism  
364 using two actin variants to perform several actin-based functions.

365

### 366 **Molecular subtleties guide actins to appropriate networks**

367 This study was originally motivated to provide a systematic description of the  
368 molecular principles by which different actin isoforms could become spatially  
369 segregated into different networks. Experiments performed here show that a  
370 biomimetic system, using a reduced set of essential proteins for patch and cable  
371 assembly, is sufficient to provide basic molecular explanation of differences observed  
372 in cells. While one actin (Act\_Ca) seems inefficient in nucleating or assembling into



373 branched-actin networks, the other actin (Act\_N2) seems to assemble in both types  
374 of actin networks. However, Act\_N2 is defective in binding to tropomyosin, which is  
375 an essential component for cable stability in cells, as it protects them from the action  
376 of disassembly factors such as ADF/cofilin. This result highlights that the segregation  
377 of actin isoforms can be influenced after filament nucleation. Although actin  
378 nucleators tend to be in the spotlight, it must be stressed that most ABPs have  
379 different effects on branched- and linear-actin networks and their influence needs to  
380 be taken into account (Rotty *et al*, 2015; Suarez & Kovar, 2016; Antkowiak *et al*,  
381 2019). Proteins like tropomyosin and ADF/cofilin stabilize linear networks of actin  
382 filaments, while enhancing disassembly of branched networks. In this context, any  
383 actin variant with defective binding to ADF/cofilin or tropomyosin will naturally be  
384 more present within branched networks, while absent from linear ones.

385

386 Overall, the principles outlined above should be valid regardless of the mechanism  
387 by which variation is brought to the specific actin, whether it is through changes in the  
388 peptide sequence or through post-translational modifications. Also, from an  
389 evolutionary perspective, the proposed mechanism appears to be efficient in allowing  
390 the emergence of new actin isoforms associated with discrete actin functions. Our  
391 model implies that a simple actin gene duplication, followed by minimal mutation in  
392 one actin copy, which impairs an essential interaction with an ABP, could be  
393 sufficient to trigger a global reorganization of the actin cytoskeleton, whereby each  
394 actin network becomes enriched in one actin isoform or the other.

395

396 We now have precise structural information on how actin interacts with many ABPs  
397 (Pollard, 2016; Tanaka *et al*, 2018; Fedorov *et al*, 1997; Shaaban *et al*, 2020; Baek *et*

398 *al*, 2008; Eads *et al*, 1998; Urnavicius *et al*, 2015; Otomo *et al*, 2005; Thompson *et al*,  
399 2013; von der Ecken *et al*, 2015). Careful analysis of actin-actin and actin-ABPs  
400 interactions can be a powerful tool to predict which ABPs affect the roles of specific  
401 actin isoforms in discrete actin networks. For example, such analysis indicates that  
402 most Act\_Ca substitutions affect its interface with the Arp2/3 complex, providing  
403 potential explanation for defective assembly into branched-actin networks. In parallel,  
404 our knowledge of the molecular principles involved in the assembly of the different  
405 actin networks of the cell allows us to anticipate the consequences of varying the  
406 affinity between actin and an ABP.

407

#### 408 **Consequences of multiple functions deriving from a single or multiple actin** 409 **isoforms**

410 Finally, the generation of a yeast strain carrying two different actin variants allowed  
411 us to question the main differences between systems using the same actin and  
412 systems using several actin isoforms to perform various actin-based functions. We  
413 showed that addition of CK-666 in strains expressing both actins Act\_Ca and Act\_N2  
414 did not lead to similar cytoskeletal reorganization as in wild-type strains (Fig. 7  
415 bottom). While cells expressing wild-type actin can easily shift actin use from patches  
416 to cables, the mechanism was less efficient for a two-actin system, indicating a  
417 perturbed homeostasis of actin networks. This observation brings additional evidence  
418 that assembly of both actin networks is more independent in a two-actin system.  
419 Therefore, it is possible that an important difference highlighted here is that  
420 organisms using a single actin for multiple actin functions have the possibility for  
421 global reorganization of the actin cytoskeleton, where increased assembly of a  
422 specific actin network occurs at the expense of others. Conversely, for organisms

423 using multiple actin isoforms, the various actin assembly pathways may be  
424 modulated separately, allowing for more autonomous actin networks and functions.  
425

## 426 **Material and methods**

### 427 **Reconstruction of ancestral protein sequences and selection of actins**

428 Actin amino acid sequences from 122 different species, selected from different  
429 branches of the eukaryotic tree of life to cover a wide range of variations, were  
430 collected from annotated and reviewed UniProtKB/Swiss-Prot entries. For species  
431 encoding more than one actin, the cytoplasmic actin with the most similar sequence  
432 to *S. cerevisiae* actin was selected. The resulting 122 selected sequences from  
433 different species were aligned using the Multiple Sequence Alignment program  
434 Clustal Omega (Madeira *et al*, 2019) in Pearson/FASTA format. The phylogenetic  
435 tree of the 122 species was created based on the NCBI taxonomy using the  
436 phylogenetic tree generator phyloT (<https://phylot.biobyte.de/>). Ancestral actin  
437 sequence reconstruction was performed from multiple sequence alignment and  
438 phylogenetic tree inputs using FastML (Ashkenazy *et al*, 2012). 99% of the amino  
439 acids in the ancestral sequences are predicted with an accuracy >95% and uncertain  
440 residues correspond to conservative substitutions (Grantham score <100,  
441 (Grantham, 1974)).

442

### 443 **Generation of plasmids for efficient and rapid actin gene replacement**

444 We generated two plasmid backbones, which carried in succession a sequence  
445 upstream of the yeast actin promoter (-804 to -467 from *act1* gene) as a first site for  
446 homologous recombination, a first selection marker (URA3 or HIS3), the yeast actin  
447 promoter (-473 to 0), the *act1* coding sequence, a short sequence downstream of the  
448 actin gene (+1437 to +1703), a second selection marker (LEU2 or KanMX3) and  
449 lastly a sequence downstream of the yeast actin gene as a second site for  
450 homologous recombination (+1543 to +2071). The advantage of having two different

451 selection markers within the same plasmid is to easily select correct insertions of  
452 DNA fragments from partial insertions which are more frequent when targeting an  
453 essential gene like actin. These plasmids also contain four unique restriction sites:  
454 PacI and XbaI, on each side of the actin gene, allowed to sub-clone easily new actin  
455 coding sequences in the plasmid; Bsu36I and AatII before and after the two sites for  
456 homologous recombination, allowed to obtain linear DNA fragments for yeast  
457 transformation.

458

459 The new actin genes used in this study were obtained commercially from whole gene  
460 synthesis techniques (Synbio Technologies). For analysis of *S. cerevisiae*'s actin  
461 expression effects from various nucleotide sequences, we selected multiple actin  
462 nucleotide sequences from the specified species and we point mutated the  
463 corresponding codons so that the translation product is *S. cerevisiae*'s actin. For  
464 analysis of exogenous actin expression effects, we manually changed the coding  
465 sequence of *S. cerevisiae*'s actin gene (*act1*) by changing the specific codons that  
466 correspond to amino acid mutations respecting the budding yeast codon usage. All  
467 plasmids generated for this study are listed in Table S2 and the actin sequences are  
468 given in Fig. S1 C.

469

#### 470 **Yeast strain generation**

471 Actin gene replacement was performed in diploid cells. *S. cerevisiae* were  
472 transformed using the LiAc/SS carrier DNA/PEG method (Gietz & Schiestl, 2007) and  
473 grown on dual selection media. Correct insertion of DNA fragments were verified by  
474 PCR for all strains and sequenced. Strains were stored as heterozygous diploids and

475 haploid mutant strains were isolated by tetrad analysis for study. Tables S3 and S4  
476 list all the haploid and diploid yeast strains used in this study.

477

#### 478 **Yeast growth assays on plates**

479 For yeast growth assays, yeast cells were grown in YPD (2% bacto-peptone, 1%  
480 yeast extract, 2% dextrose) overnight at 25°C. Equal amounts cells were calculated  
481 from log phase growing cultures were serially diluted and spotted on YPD plates.  
482 Pictures of plates were taken after 2 days of growth at 25°C.

483

#### 484 **Actin cytoskeleton organization in yeast**

- 485 • *Yeast cell phalloidin staining and imaging*

486 Log phase cultures in YPD medium at 25°C were fixed with 4% formaldehyde for 2 h.  
487 For CK-666-sensitivity assays, cells were treated with the indicated concentration of  
488 CK-666 (Sigma-Aldrich SML0006) for 30 min before fixation. After fixation, cells were  
489 washed twice in PBS and stained overnight with 250 nM Phalloidin-Alexa568  
490 (Invitrogen, ref. A12380) at 25°C. Samples were washed twice with PBS, re-  
491 suspended in PBS-70% glycerol and directly mounted for imaging. Cells were  
492 imaged using a Leica TCS SP8 X White Light Laser confocal microscope equipped  
493 with a HC PL APO CS2 100x/1.4NA Oil objective and a hybrid detector. Z-stack  
494 images were collected every 0.3 µm with Las X 3.5.5.19976 software.

495

- 496 • *Data analysis for live imaging*

497 Branched- and linear-actin network assembly in medium budded cells was assessed  
498 from the intensity of actin patches and cables, respectively. Total cell cable  
499 intensities were calculated from maximum intensity z-stack projections using Fiji

500 v.1.53a. For total cell endocytic patch intensities, patches were identified using the  
501 TrackMate plugin of Fiji (Planade *et al*, 2019; Tinevez *et al*, 2017). Patch detection  
502 was corrected manually using the spot editing tool and the integrated intensity for all  
503 patches was calculated from the analysis table of TrackMate.  
504 Fluorescence intensity of phalloidin labeling varied between strains expressing  
505 different actin variants. For this reason, the contrast of images showed in the figures  
506 was adapted from strain to strain so that both actin structures remained clearly visible.  
507 In addition, rather than reporting total intensities, we compared the relative assembly  
508 of branched- and linear- actin networks for each strain. This choice is also motivated  
509 by the fact that actin networks do not assemble independently but compete for a  
510 limited pool of monomeric actin (Burke *et al*, 2014). We calculated an *in vivo* actin  
511 network deviation index, defined as in (Antkowiak *et al*, 2019):

$$\text{In vivo Actin Network Deviation Index} = \frac{\frac{I_{\text{patch}}}{\bar{I}_{\text{patch,wild-type}}} - \frac{I_{\text{cable}}}{\bar{I}_{\text{cable,wild-type}}}}{\frac{I_{\text{patch}}}{\bar{I}_{\text{patch,wild-type}}} + \frac{I_{\text{cable}}}{\bar{I}_{\text{cable,wild-type}}}}$$

512 , where  $I_{\text{patch}}$  (resp.  $I_{\text{cable}}$ ) is the total patch (respectively cable) fluorescence  
513 intensity of the cell of interest, and  $\bar{I}_{\text{patch,Sc}}$  (resp.  $\bar{I}_{\text{cable,Sc}}$ ) is the mean total intensity of  
514 actin patches (resp. cables) in wild type *S. cerevisiae*'s cells. This branched-to-linear  
515 actin network ratio was calculated for each cell, and compared to *in vivo* actin  
516 network deviation indexes of wild-type *S. cerevisiae*'s cells.

517 For cell polarity, number of visible patches in the bud ( $Patches_{\text{bud}}$ ) and in the mother  
518 cell ( $Patches_{\text{mother}}$ ) were taken into account to calculate a polarity index:

$$\text{Polarity index} = \frac{Patches_{\text{bud}} - Patches_{\text{mother}}}{Patches_{\text{bud}} + Patches_{\text{mother}}}$$

519

520

## 521 **Quantification of actin expression levels**

522 A mouse anti-Actin C4 primary antibody (Fisher Scientific, ref. 08691002; 1:10,000  
523 dilution) was selected to recognize actin. Its epitope is located around amino acids  
524 50-70, which corresponds to a highly conserved region across all actins used in this  
525 study, with the exception of position 70 (a lysine in Homo sapiens beta actin; an  
526 arginine for all other actins). To test the antibody's sensitivity to this amino acid  
527 variability, different amounts of purified rabbit muscle actin, which contains a lysine in  
528 position 70 and purified budding yeast actin, which contains an arginine in position  
529 70, were loaded on a 12% gel. After protein migration, gels were transferred to a  
530 nitrocellulose membrane, incubated with mouse anti-Actin C4 primary antibody  
531 (Fisher Scientific, ref. 08691002; 1:10,000 dilution) overnight at 4°C, then incubated  
532 with a goat anti-mouse HRP antibody (Jackson ImmunoResearch, ref. 115-035-146;  
533 1:10,000 dilution) for 1 h at 25°C and revealed with Western lightning plus ECL  
534 reagent (PerkinElmer, Inc., ref. NEL104001EA). After the Western blots were  
535 imaged, membranes were incubated with Ponceau S for 10 minutes and imaged  
536 again. Immunostaining signals were compared relative to Ponceau staining signals.  
537 Value of 12 measurements indicated on average a 1.48-fold stronger signal for rabbit  
538 muscle actin compared to *S. cerevisiae*'s actin. This value was used afterwards as a  
539 normalization factor when comparing the expression of Act\_Hs and the expression of  
540 other actins in yeast.

541 Total protein samples from *S. cerevisiae* strains were prepared by trichloroacetic acid  
542 precipitation as described in (Reid & Schatz, 1982). 12% SDS-PAGE gels were  
543 loaded with 15 µg of total protein sample, and transferred to a nitrocellulose  
544 membrane after protein migration. Actin was recognized by anti-Actin C4 primary  
545 antibody (Fisher Scientific, ref. 08691002; 1:10,000 dilution). For our loading control,



546 we selected a rabbit anti-alpha tubulin primary antibody (Abcam, ref. ab184970;  
547 1:20,000 dilution). Western blots were incubated with goat anti-mouse HRP (Jackson  
548 ImmunoResearch, ref. 115-035-146; 1:10,000 dilution) and goat Anti-rabbit IgG H&L  
549 (HRP) (Abcam, ref. ab205718; 1:20,000 dilution) secondary antibodies. Western  
550 blots were revealed with Western Lightning Plus ECL reagent (PerkinElmer, Inc., ref.  
551 NEL104001EA), on a ChemiDoc MP imaging system (BioRad). We verified the  
552 linearity of results obtained with this method over a range of 3 µg to 30 µg of total  
553 extract loaded in the gels. Bands intensities were calculated using the Image Lab  
554 6.0.1 software. Actin signals were relativized to the tubulin signals. The same control  
555 sample was loaded in all membranes and all values were normalized to this lane.

556

## 557 **Protein purification and labeling**

558 *Actins.*

559 Strains expressing Act1, Act\_N2 and Act\_Ca were used to purify the respective  
560 actins. Large-scale cultures were prepared at 25°C in YPD and harvested by  
561 centrifugation. Pellets were frozen in liquid nitrogen and ground in a steel blender  
562 (Waring, Winsted, CT, USA) (Michelot & Drubin, 2014). Actins were affinity-purified  
563 on a DNase I- column (Goode, 2002). Yeast powder was resuspended in G1 buffer  
564 (10 mM Tris-HCl, 0.5 mM ATP, 0.2 mM DTT, 0.2 mM CaCl<sub>2</sub>) containing protease  
565 inhibitors (Protease Inhibitor Cocktail Set IV, Calbiochem, reference 539136), and  
566 centrifuged for 30 min at 160,000 x g at 4°C. The lysate was passed through a  
567 DNase I column. Bound actin was purified and eluted with G1 buffer supplemented  
568 with 50% formamide, and dialysed against G1 buffer with less calcium (10 mM Tris-  
569 HCl, 0.5 mM ATP, 0.2 mM DTT, 0.1 mM CaCl<sub>2</sub>) overnight. Rabbit muscle actin was  
570 purified from standard procedures (Spudich and Watt, 1971).

571 *Actin labeling.*

572 G-actin from rabbit muscle was dialyzed against 25 mM Hepes pH 7.5, 50 mM KCl,  
573 0.1 mM CaCl<sub>2</sub>, 0.2 mM ATP) at 4°C for 12 h. A 6-fold-excess of Alexa Fluor 568  
574 succinimidyl ester dye was added and incubated overnight. F-actin was then  
575 centrifugated at 390,000 x g for 40 min, pellet was resuspended and dialyzed against  
576 G buffer for 2 h at 4°C. Labeled actin was centrifugated at 390,000 x g for 40 min to  
577 remove insoluble components and labeled actin was eventually loaded into a G25  
578 column to remove unbound fluorophore.

579 *Formin.*

580 *S. cerevisiae* cells (MATa, leu2, ura3-52, trp1, prb1-1122, pep4-3, pre1-451) were  
581 transformed with a plasmid designed for formin overexpression (Gst-Bni1(1215-  
582 Cter)-TEV-9xHis) under the control of a GAL1 promoter) (Antkowiak *et al*, 2019)).  
583 The expression was induced with 2% galactose for 12 h at 30°C. The resulting  
584 cultures were centrifuged and cells were frozen in liquid nitrogen and ground in a  
585 steel blender. For protein purification, 5 g of yeast powder was thawed on ice with 45  
586 ml of HKI10 buffer (20 mM Hepes, pH 7.5, 200 mM KCl, 10 mM imidazole, pH 7.5),  
587 supplemented with 50 µl of Protease Inhibitor Cocktail Set IV and centrifugated at  
588 160,000 x g for 30 min. The supernatant was collected and then incubated with 500-  
589 µl of Nickel-Sepharose 6 Fast Flow (GE Healthcare Life Sciences, Piscataway, NJ,  
590 USA) for 2 h at 4°C. Protein bound to Nickel-Sepharose beads was washed with  
591 HKI20 buffer (20 mM Hepes, pH 7.5, 200 mM KCl, 20 mM imidazole, pH 7.5) and  
592 cleaved from the beads by a 1 h incubation with TEV at room temperature. The  
593 protein was concentrated with an Amicon Ultra 4 ml device (Merck4Biosciences),  
594 dialyzed against HGG buffer (20 mM Hepes, pH 7.5, 200 mM KCl, 6% glycerol), flash  
595 frozen and stored -80°C.

596

597 *Arp2/3 complex.*

598 *S. cerevisiae* Arp2/3 complex was purified from commercially purchased baker's  
599 yeast (L'Hirondelle) based on a protocol modified from (Nolen & Pollard, 2008;  
600 Doolittle *et al*, 2013; Antkowiak *et al*, 2019). Yeast powder was prepared by flash  
601 freezing droplets of liquid yeast culture in liquid nitrogen and grinding them in a steel  
602 blender. 230 g of yeast powder was resuspended in a lysis buffer (20 mM Tris-HCl  
603 pH 7.5, 150 mM NaCl, 2 mM EDTA, 1 mM DTT) supplemented with Protease  
604 Inhibitor Cocktail Set IV. The mixture was centrifuged at 160,000 x g for 30 min and  
605 the supernatant was fractionated by a 50% ammonium sulfate cut. The insoluble  
606 fraction was dissolved, dialyzed in HKME buffer (25 mM Hepes pH 7.5, 50 mM KCl, 1  
607 mM EGTA, 3 mM MgCl<sub>2</sub>, 1 mM DTT, 0.1 mM ATP) overnight at 4°C and loaded onto  
608 a 2-ml Glutathione-Sepharose 4B (GE Healthcare Life Sciences, Piscataway, NJ,  
609 USA) column pre-charged with GST-N-WASp-VCA (Nolen & Pollard, 2008; Doolittle  
610 *et al*, 2013, 3; Antkowiak *et al*, 2019). The column was washed with HKME buffer and  
611 bound Arp2/3 was eluted with 20 mM Tris-HCl pH 7.5, 25 mM KCl, 200 mM MgCl<sub>2</sub>, 1  
612 mM EGTA and 1 mM DTT. The presence of protein was detected by using the  
613 Bradford reagent, fractions containing protein were pooled, concentrated with an  
614 Amicon Ultra 4-ml device (Merck4Biosciences, Darmstadt, Germany), and dialyzed  
615 against HKG buffer. Concentrated Arp2/3 was flash frozen in liquid nitrogen and kept  
616 at -80°C.

617

618 *WASp (Las17), Capping Protein, ADF/cofilin and Profilin.*

619 Rosetta 2(DE3)pLysS cells were transformed with a plasmid designed for *S.*  
620 *cerevisiae* Las17 (Gst-Las17(375-Cter)-6xHis) overexpression. Bacterial cells were

621 collected by centrifugation and then lysed in 20 mM Tris-HCl, pH 7.5, 1 mM DTT, 1  
622 mM EDTA, 200 mM NaCl, 0.1% Triton X-100, 5% glycerol and protease inhibitors  
623 (Complete Protease Inhibitor Cocktail, Roche). The lysate was centrifuged at  
624 160,000 x g for 20 min, the supernatant incubated with Glutathione-Sepharose  
625 beads, and the protein was purified from the extract. Bound proteins were then eluted  
626 with 100 mM L-glutathione reduced and subjected to a second purification by  
627 addition of Nickel-Sepharose beads 6 Fast Flow (GE Healthcare Life Sciences,  
628 Piscataway, NJ, USA). The protein was eluted with HKI500 buffer (20 mM Hepes, pH  
629 7.5, 200 mM KCl, 500 mM imidazole, pH 7.5), concentrated with an Amicon Ultra 4-  
630 ml device and dialyzed against HKG buffer. Protein was flash frozen in liquid nitrogen  
631 and kept at  $-80^{\circ}\text{C}$ .

632 *S. cerevisiae* capping protein, ADF/cofilin and profilin were purified as in (Gressin *et*  
633 *al*, 2015). Briefly, proteins were overexpressed in Rosetta 2(DE3)pLysS cells.  
634 Cultures were lysed, centrifuged and supernatant were incubated with Nickel-  
635 Sepharose beads 6 Fast Flow in HKI20 buffer (20mM Hepes pH 7.5, 200 mM KCl, 20  
636 mM imidazole pH 7.5, 0,1% Triton X-100, 10% glycerol). Proteins were eluted with  
637 HKI500 buffer and dialyzed against HKG buffer. They were then flash frozen in liquid  
638 nitrogen and kept at  $-80^{\circ}\text{C}$ .

639 The labeling of ADF/cofilin was performed using an ADF/cofilin D34C mutant  
640 (Gressin *et al*, 2015). Yeast ADF/cofilin D34C mutant was bound to Nickel-  
641 Sepharose beads 6 Fast Flow as described above for the wild-type protein. A 5 fold-  
642 excess of Alexa Fluor 488 C5-maleimide (Thermo Fisher Scientific) was added  
643 overnight at  $4^{\circ}\text{C}$ . Bound protein was cleared from unbound fluorophore before elution  
644 in HKI500 buffer, dialyzed against HKG buffer, flash frozen and kept at  $-80^{\circ}\text{C}$ .

645

646 *Tropomyosin.*

647 Rosetta 2(DE3)pLysS cells were transformed with a plasmid designed for *S.*  
648 *cerevisiae* tropomyosin Tpm1p overexpression. This tropomyosin was modified to  
649 contain an Ala-Ser extension at the N-terminal, which mimics its acetylation, and was  
650 purified based on a protocol modified from (Skau *et al*, 2009). Briefly, bacteria  
651 overexpressing tropomyosin were lysed by sonication in a buffer (50 mM imidazole-  
652 HCl, pH 6.9, 300 mM KCl, 5 mM MgCl<sub>2</sub>, 0.3 mM phenylmethylsulfonyl fluoride)  
653 supplemented with protease inhibitors (Complete Protease Inhibitor Cocktail,  
654 Roche)). Cells were then boiled for 10 min, and the resulting mixture was  
655 centrifugated at 300,000 x g for 20 min. The supernatant which contains pure  
656 tropomyosin was dialyzed overnight at 4°C against a dialysis buffer (50 mM KCl, 10  
657 mM Tris-HCl, pH 7.5 and 0.5 mM DTT). Tpm1p labeling was performed with the  
658 same strategy used for fission yeast tropomyosin Cdc8 labeling (Christensen *et al*,  
659 2017). We mutated *tpm1*'s histidine 114 by site directed mutagenesis to introduce a  
660 cysteine (H114C). Immediately after tropomyosin Ala-Ser-Tpm1p H114C purification,  
661 the protein was labeled by incubation with a 5-fold excess Alexa Fluor 488 C5-  
662 maleimide over tropomyosin overnight at 4°C, and separated on a Sephadex G-25  
663 gel filtration column. The purified fluorescent protein was flash frozen in liquid  
664 nitrogen and kept at -80°C.

665

## 666 **Branched- and linear-actin network assembly from microbeads**

667 *Functionalization of beads.*

668 Polystyrene microspheres (2 µm diameter, 2.5% solid (w/v) aqueous suspension,  
669 Polysciences, Inc) were washed with HK buffer (20 mM Hepes pH 7.5, 150 mM KCl),  
670 diluted 10 times and incubated with 1 µM Las17 for 30 min on ice. Beads were

671 saturated with 1% bovine serum albumin (BSA) for 15 min, washed and stored on ice  
672 in HK buffer supplemented with 0.1% BSA. Similarly, glutathione-coated particles  
673 (4.37  $\mu\text{m}$  diameter, 0.5% solid (w/v) aqueous suspension, Spherotech, Inc) were  
674 coated with GST-Bni1 (1  $\mu\text{M}$ ) and then saturated with 1% BSA, washed and stored in  
675 HK 0.1% BSA.

676

677 *Branched and linear network reconstitution.*

678 Unlabeled and fluorescent actins were mixed to reach a final concentration of 40  $\mu\text{M}$   
679 and a labeling percentage of 1%. Actin polymerization was induced by the addition of  
680 G-Buffer and 1x KMEI (50 mM KCl, 1 mM  $\text{MgCl}_2$ , 1 mM EGTA, 10 mM imidazole  
681 Fluorescence Blank pH 7.8) for 1 h at RT. Las17- and Bni1-coated beads were  
682 incubated with F-actin and a minimal set of proteins in a motility buffer (50 mM KCl, 5  
683 mM Hepes, 2.4 mM  $\text{MgCl}_2$ ; 4 mM DTT; 1 mM ATP; 0.36% methylcellulose 1500 cP  
684 and 1.5% BSA) which triggers actin assembly. Standard optimal protein  
685 concentrations were 8  $\mu\text{M}$  F-actin, 15  $\mu\text{M}$  profilin, 1  $\mu\text{M}$  capping protein, 500 nM  
686 Arp2/3 complex and 600 nM ADF/cofilin. When fluorescent proteins were used, their  
687 concentrations were 600 nM for Alexa 488-ADF/cofilin (in which case no black  
688 ADF/cofilin was added) and 1  $\mu\text{M}$  for Alexa 488-tropomyosin.

689

690 *Image acquisition, processing and analysis.*

691 Images of several beads were acquired 30 min. after the initiation of the experiment  
692 on a Zeiss Axio Observer Z1 equipped with a 100x/1.4NA Oil Ph3 Plan-Apochromat  
693 objective and a Hamamatsu ORCA-Flash 4.0LT camera. Images were acquired with  
694 Zen 2.3 blue edition using the same light intensity and exposure time.

695

696 *Data quantification for biomimetic assays.*

697 Fluorescence intensity of actin networks and fluorescent ABPs was quantified using  
698 Fiji (Version 1.52p), and fluorescence of the background was subtracted. Similarly  
699 to the *in vivo* actin network deviation index, a linear-to-branched ratio was calculated  
700 to compare the efficiency of actin assembly *in vitro* for both branched- and linear-  
701 networks of actin filaments for a given biochemical condition. This index measures  
702 how actin assembly between branched and linear networks deviates from the values  
703 obtained when *S. cerevisiae* actin is used. It is defined as follows:

$$\textit{In vitro Actin Network Deviation Index} = \frac{\frac{\bar{I}_{branched}}{\bar{I}_{Sc,branched}} - \frac{\bar{I}_{linear}}{\bar{I}_{Sc,linear}}}{\frac{\bar{I}_{branched}}{\bar{I}_{Sc,branched}} + \frac{\bar{I}_{linear}}{\bar{I}_{Sc,linear}}}$$

704 Where  $\bar{I}_{branched}$  is the average normalized intensity of the branched network for all  
705 Las17 beads with a given actin,  $\bar{I}_{Sc,branched}$  is the same value for *S. cerevisiae* actin,  
706  $\bar{I}_{linear}$  is the average normalized intensity of the linear network for all Bni beads with  
707 a given actin and  $\bar{I}_{Sc,linear}$  is the same value for *S. cerevisiae* actin.

708

### 709 **Actin-ABP contact analysis**

710 The amino acid positions of the substitutions between *Saccharomyces cerevisiae*  
711 (Act\_Sc), Node 2 (Act\_N2), and *Candida albicans* (Act\_Ca) actin sequences were  
712 inspected within high resolution X-ray crystal and cryoEM structures of complexes  
713 containing actin. The PDB accession codes are: G-actin (1YAG) (Vorobiev *et al*,  
714 2003), F-actin (6DJN) (Chou & Pollard, 2019), ADF/cofilin (5YU8 and 1CFY) (Tanaka  
715 *et al*, 2018; Fedorov *et al*, 1997), Arp2/3 daughter filament (6W17) (Shaaban *et al*,  
716 2020), profilin (1YPR and 3CHW) (Baek *et al*, 2008; Eads *et al*, 1998); CP/Arp1  
717 (5ADX) (Urnavicius *et al*, 2015), WH2 (5YPU), formin (1Y64 and 4EAH) (Otomo *et al*,

718 2005; Thompson *et al*, 2013) and tropomyosin (5JLF) (von der Ecken *et al*, 2016).  
719 Actin residues that are within 5 Å of the binding protein were identified in the CCP4  
720 program CONTACT (Winn *et al*, 2011), with the exception of the Arp2/3 mother  
721 filament which were within 10 Å since the coordinates were not released when this  
722 study was performed (Fäßler *et al*, 2020). All contacts were visually inspected in  
723 COOT (Emsley *et al*, 2010).

724

### 725 **Data availability**

726 This study includes no data deposited in external repositories.

727

### 728 **Data reproducibility**

729 All experiments were repeated at least two times. In all plots, error bars indicate  
730 standard deviations. As standard deviations were not similar for all experiments, we  
731 used Brown-Forsythe and Welch ANOVA tests, with Dunnett's T3 multiple  
732 comparisons tests. P value style: \* <0.05, \*\* <0.01, \*\*\* <0.001. Correlations were  
733 computed with a two-tailed p value and a confidence interval of 95%, correlation  
734 coefficients r correspond to Pearson correlation coefficients.

735 For the colony area measurements, colonies were measured from 2 plates, results  
736 were normalized to control and pulled together. More than 10 colonies per strain  
737 were quantified. For western blot measurements, 2 independent samples per strain  
738 were loaded twice each and analyzed. For phalloidin stained cells, 30 cells were  
739 measured per strain. For the *in vitro* polymerization assays, at least 14 beads were  
740 measured from two independent experiments, and data presented in the manuscript  
741 correspond to the two sets of experiments pulled together.

742



743

## 744 **Acknowledgements**

745 The authors thank Isabelle Sagot and Emilia Mauriello for their invaluable advice on  
746 the project, and Sarah Würbel for her technical help. This project has received  
747 funding from the European Research Council (ERC) under the European Union's  
748 Horizon 2020 research and innovation programme (grant agreement n°  
749 638376/Segregactin) to A.M., from the Labex INFORM (ANR-11-LABX-0054, funded  
750 by the 'Investissements d'Avenir French Government program'), and from the  
751 Fondation pour la Recherche Médicale (FRM) to M.B.S. under the program Fin de  
752 these (ref. FDT201904008021). R.C.R. thanks Vidyasirimedhi Institute of Science  
753 and Technology (VISTEC), RIIS and JSPS (KAKENHI grant number JP20H00476)  
754 for support. We acknowledge the France-BioImaging infrastructure supported by the  
755 French National Research Agency (ANR-10-INSB-04-01).

756

757

## 758 **Author contributions**

759 Conceptualization, Methodology and Writing: M.B.S., C.P.T., R.C.R. and A.M.

760 Investigation: M.B.S., C.P.T., A.A., A.G., R.C.R. and A.M.

761 Validation and Visualization: M.B.S.

762 Funding acquisition, Supervision and Project administration: R.C.R. and A.M.

763

## 764 **Conflict of interest**

765 The authors declare no conflict of interest.

766

## 767 **References**

- 768 A M, Latario CJ, Pickrell LE & Higgs HN (2020) Lysine acetylation of cytoskeletal proteins:  
769 Emergence of an actin code. *J Cell Biol* 219
- 770 Antkowiak A, Guillotin A, Boiero Sanders M, Colombo J, Vincentelli R & Michelot A  
771 (2019) Sizes of actin networks sharing a common environment are determined by the  
772 relative rates of assembly. *PLoS Biol* 17: e3000317
- 773 Ashkenazy H, Penn O, Doron-Faigenboim A, Cohen O, Cannarozzi G, Zomer O & Pupko T  
774 (2012) FastML: a web server for probabilistic reconstruction of ancestral sequences.  
775 *Nucleic Acids Res* 40: W580–W584
- 776 Baek K, Liu X, Ferron F, Shu S, Korn ED & Dominguez R (2008) Modulation of actin  
777 structure and function by phosphorylation of Tyr-53 and profilin binding. *Proc Natl*  
778 *Acad Sci U S A* 105: 11748–11753
- 779 Bernstein BW & Bamburg JR (1982) Tropomyosin binding to F-actin protects the F-actin  
780 from disassembly by brain actin-depolymerizing factor (ADF). *Cell Motil* 2: 1–8
- 781 Blanchoin L, Boujemaa-Paterski R, Sykes C & Plastino J (2014) Actin Dynamics,  
782 Architecture, and Mechanics in Cell Motility. *Physiol Rev* 94: 235–263
- 783 Blanchoin L, Pollard TD & Hitchcock-DeGregori SE (2001) Inhibition of the Arp2/3  
784 complex-nucleated actin polymerization and branch formation by tropomyosin. *Curr*  
785 *Biol CB* 11: 1300–1304
- 786 Boiero Sanders M, Antkowiak A & Michelot A (2020) Diversity from similarity: cellular  
787 strategies for assigning particular identities to actin filaments and networks. *Open Biol*  
788 10: 200157
- 789 Bryan KE & Rubenstein PA (2005) An Intermediate Form of ADP-F-actin. *J Biol Chem* 280:  
790 1696–1703
- 791 Burke TA, Christensen JR, Barone E, Suarez C, Sirotkin V & Kovar DR (2014) Homeostatic  
792 Actin Cytoskeleton Networks Are Regulated by Assembly Factor Competition for  
793 Monomers. *Curr Biol* 24: 579–585
- 794 Buzan JM & Frieden C (1996) Yeast actin: polymerization kinetic studies of wild type and a  
795 poorly polymerizing mutant. *Proc Natl Acad Sci U S A* 93: 91–95
- 796 Chan C, Beltzner CC & Pollard TD (2009) Cofilin Dissociates Arp2/3 Complex and Branches  
797 from Actin Filaments. *Curr Biol CB* 19: 537–545
- 798 Chen A, Arora PD, McCulloch CA & Wilde A (2017) Cytokinesis requires localized  $\beta$ -actin  
799 filament production by an actin isoform specific nucleator. *Nat Commun* 8
- 800 Chou SZ & Pollard TD (2019) Mechanism of actin polymerization revealed by cryo-EM  
801 structures of actin filaments with three different bound nucleotides. *Proc Natl Acad*  
802 *Sci U S A* 116: 4265–4274

- 803 Christensen JR, Hocky GM, Homa KE, Morganthaler AN, Hitchcock-DeGregori SE, Voth  
804 GA & Kovar DR (2017) Competition between Tropomyosin, Fimbrin, and  
805 ADF/Cofilin drives their sorting to distinct actin filament networks. *eLife* 6
- 806 DesMarais V, Ichetovkin I, Condeelis J & Hitchcock-DeGregori SE (2002) Spatial regulation  
807 of actin dynamics: a tropomyosin-free, actin-rich compartment at the leading edge. *J*  
808 *Cell Sci* 115: 4649–4660
- 809 Doolittle LK, Rosen MK & Padrick SB (2013) Purification of Arp2/3 complex from  
810 *Saccharomyces cerevisiae*. *Methods Mol Biol Clifton NJ* 1046: 251–271
- 811 Dugina V, Zwaenepoel I, Gabbiani G, Clement S & Chaponnier C (2009)  $\beta$ - and  $\gamma$ -  
812 cytoplasmic actins display distinct distribution and functional diversity. *J Cell Sci* 122:  
813 2980–2988
- 814 Eads JC, Mahoney NM, Vorobiev S, Bresnick AR, Wen KK, Rubenstein PA, Haarer BK &  
815 Almo SC (1998) Structure determination and characterization of *Saccharomyces*  
816 *cerevisiae* profilin. *Biochemistry* 37: 11171–11181
- 817 von der Ecken J, Heissler SM, Pathan-Chhatbar S, Manstein DJ & Raunser S (2016) Cryo-  
818 EM structure of a human cytoplasmic actomyosin complex at near-atomic resolution.  
819 *Nature* 534: 724–8
- 820 von der Ecken J, Müller M, Lehman W, Manstein DJ, Penczek PA & Raunser S (2015)  
821 Structure of the F-actin–tropomyosin complex. *Nature* 519: 114–117
- 822 Emsley P, Lohkamp B, Scott WG & Cowtan K (2010) Features and development of Coot.  
823 *Acta Crystallogr D Biol Crystallogr* 66: 486–501
- 824 Ezezika OC, Younger NS, Lu J, Kaiser DA, Corbin ZA, Nolen BJ, Kovar DR & Pollard TD  
825 (2009) Incompatibility with formin Cdc12p prevents human profilin from substituting  
826 for fission yeast profilin: insights from crystal structures of fission yeast profilin. *J*  
827 *Biol Chem* 284: 2088–2097
- 828 Fäßler F, Dimchev G, Hodirnau V-V, Wan W & Schur FKM (2020) Cryo-electron  
829 tomography structure of Arp2/3 complex in cells reveals new insights into the branch  
830 junction. *Nat Commun* 11: 6437
- 831 Fedorov AA, Lappalainen P, Fedorov EV, Drubin DG & Almo SC (1997) Structure  
832 determination of yeast cofilin. *Nat Struct Biol* 4: 366–369
- 833 Gietz RD & Schiestl RH (2007) High-efficiency yeast transformation using the LiAc/SS  
834 carrier DNA/PEG method. *Nat Protoc* 2: 31–34
- 835 Goode BL (2002) Purification of yeast actin and actin-associated proteins. *Methods Enzymol*  
836 351: 433–441
- 837 Grantham R (1974) Amino acid difference formula to help explain protein evolution. *Science*  
838 185: 862–864
- 839 Gressin L, Guillotin A, Guérin C, Blanchoin L & Michelot A (2015) Architecture dependence  
840 of actin filament network disassembly. *Curr Biol CB* 25: 1437–1447

- 841 Gunning PW, Ghoshdastider U, Whitaker S, Popp D & Robinson RC (2015) The evolution of  
842 compositionally and functionally distinct actin filaments. *J Cell Sci* 128: 2009–2019
- 843 Hatano T, Alioto S, Roscioli E, Palani S, Clarke ST, Kamnev A, Hernandez-Fernaud JR,  
844 Sivashanmugam L, Chapa-Y-Lazo B, Jones AME, *et al* (2018) Rapid production of  
845 pure recombinant actin isoforms in *Pichia pastoris*. *J Cell Sci* 131
- 846 Hatano T, Sivashanmugam L, Suchenko A, Hussain H & Balasubramanian MK (2020) Pick-  
847 ya actin - a method to purify actin isoforms with bespoke key post-translational  
848 modifications. *J Cell Sci* 133
- 849 Hocky GM, Baker JL, Bradley MJ, Sinitskiy AV, De La Cruz EM & Voth GA (2016) Cations  
850 Stiffen Actin Filaments by Adhering a Key Structural Element to Adjacent Subunits. *J*  
851 *Phys Chem B* 120: 4558–67
- 852 Hoekema A, Kastelein RA, Vasser M & de Boer HA (1987) Codon replacement in the PGK1  
853 gene of *Saccharomyces cerevisiae*: experimental approach to study the role of biased  
854 codon usage in gene expression. *Mol Cell Biol* 7: 2914–2924
- 855 Kang H, Bradley MJ, Cao W, Zhou K, Grintsevich EE, Michelot A, Sindelar CV,  
856 Hochstrasser M & De La Cruz EM (2014) Site-specific cation release drives actin  
857 filament severing by vertebrate cofilin. *Proc Natl Acad Sci* 111: 17821–17826
- 858 Kang H, Bradley MJ, McCullough BR, Pierre A, Grintsevich EE, Reisler E & De La Cruz  
859 EM (2012) Identification of cation-binding sites on actin that drive polymerization and  
860 modulate bending stiffness. *Proc Natl Acad Sci U S A* 109: 16923–7
- 861 Kashina A (2014) Protein arginylation, a global biological regulator that targets actin  
862 cytoskeleton and the muscle. *Anat Rec Hoboken NJ* 2007 297: 1630–1636
- 863 Kijima ST, Hirose K, Kong S-G, Wada M & Uyeda TQP (2016) Distinct Biochemical  
864 Properties of *Arabidopsis thaliana* Actin Isoforms. *Plant Cell Physiol* 57: 46–56
- 865 Kijima ST, Staiger CJ, Katoh K, Nagasaki A, Ito K & Uyeda TQP (2018) *Arabidopsis*  
866 vegetative actin isoforms, AtACT2 and AtACT7, generate distinct filament arrays in  
867 living plant cells. *Sci Rep* 8: 4381
- 868 Kim E, Miller CJ & Reisler E (1996) Polymerization and in vitro motility properties of yeast  
869 actin: a comparison with rabbit skeletal alpha-actin. *Biochemistry* 35: 16566–16572
- 870 Madeira F, Park YM, Lee J, Buso N, Gur T, Madhusoodanan N, Basutkar P, Tivey ARN,  
871 Potter SC, Finn RD, *et al* (2019) The EMBL-EBI search and sequence analysis tools  
872 APIs in 2019. *Nucleic Acids Res* 47: W636–W641
- 873 McCullough BR, Grintsevich EE, Chen CK, Kang H, Hutchison AL, Henn A, Cao W, Suarez  
874 C, Martiel J-L, Blanchoin L, *et al* (2011) Cofilin-linked changes in actin filament  
875 flexibility promote severing. *Biophys J* 101: 151–159
- 876 Michelot A, Berro J, Guérin C, Boujemaa-Paterski R, Staiger CJ, Martiel J-L & Blanchoin L  
877 (2007) Actin-Filament Stochastic Dynamics Mediated by ADF/Cofilin. *Curr Biol* 17:  
878 825–833

- 879 Michelot A & Drubin DG (2014) Dissecting principles governing actin assembly using yeast  
880 extracts. *Methods Enzymol* 540: 381–397
- 881 Moseley JB & Goode BL (2006) The Yeast Actin Cytoskeleton: from Cellular Function to  
882 Biochemical Mechanism. *Microbiol Mol Biol Rev* 70: 605–645
- 883 Nefsky B & Bretscher A (1992) Yeast actin is relatively well behaved. *Eur J Biochem* 206:  
884 949–955
- 885 Ng R, Domdey H, Larson G, Rossi JJ & Abelson J (1985) A test for intron function in the  
886 yeast actin gene. *Nature* 314: 183–184
- 887 Nolen BJ & Pollard TD (2008) Structure and biochemical properties of fission yeast Arp2/3  
888 complex lacking the Arp2 subunit. *J Biol Chem* 283: 26490–26498
- 889 Orlova A, Galkin VE, VanLoock MS, Kim E, Shvetsov A, Reisler E & Egelman EH (2001)  
890 Probing the structure of F-actin: cross-links constrain atomic models and modify actin  
891 dynamics. *J Mol Biol* 312: 95–106
- 892 Otomo T, Tomchick DR, Otomo C, Panchal SC, Machius M & Rosen MK (2005) Structural  
893 basis of actin filament nucleation and processive capping by a formin homology 2  
894 domain. *Nature* 433: 488–94
- 895 Planade J, Belbahri R, Boiero Sanders M, Guillotin A, du Roure O, Michelot A & Heuvingh J  
896 (2019) Mechanical stiffness of reconstituted actin patches correlates tightly with  
897 endocytosis efficiency. *PLoS Biol* 17: e3000500
- 898 Pollard TD (2016) Actin and actin-binding proteins. *Cold Spring Harb Perspect Biol* 8
- 899 Popp D & Robinson RC (2012) Supramolecular cellular filament systems: how and why do  
900 they form? *Cytoskeleton* 69: 71–87
- 901 Reid GA & Schatz G (1982) Import of proteins into mitochondria. Yeast cells grown in the  
902 presence of carbonyl cyanide m-chlorophenylhydrazone accumulate massive amounts  
903 of some mitochondrial precursor polypeptides. *J Biol Chem* 257: 13056–13061
- 904 Rotty JD, Wu C, Haynes EM, Suarez C, Winkelman JD, Johnson HE, Haugh JM, Kovar DR  
905 & Bear JE (2015) Profilin-1 Serves as a Gatekeeper for Actin Assembly by Arp2/3-  
906 Dependent and -Independent Pathways. *Dev Cell* 32: 54–67
- 907 Scipion CPM, Ghoshdastider U, Ferrer FJ, Yuen TY, Wongsantichon J & Robinson RC  
908 (2018) Structural evidence for the roles of divalent cations in actin polymerization and  
909 activation of ATP hydrolysis. *Proc Natl Acad Sci U S A* 115: 10345–10350
- 910 Shaaban M, Chowdhury S & Nolen BJ (2020) Cryo-EM reveals the transition of Arp2/3  
911 complex from inactive to nucleation-competent state. *Nat Struct Mol Biol*
- 912 Skau CT, Neidt EM & Kovar DR (2009) Role of tropomyosin in formin-mediated contractile  
913 ring assembly in fission yeast. *Mol Biol Cell* 20: 2160–2173
- 914 Suarez C & Kovar DR (2016) Intenetwork competition for monomers governs actin  
915 cytoskeleton organization. *Nat Rev Mol Cell Biol* 17: 799–810

- 916 Takaine M & Mabuchi I (2007) Properties of actin from the fission yeast  
917 *Schizosaccharomyces pombe* and interaction with fission yeast profilin. *J Biol Chem*  
918 282: 21683–21694
- 919 Tanaka K, Takeda S, Mitsuoka K, Oda T, Kimura-Sakiyama C, Maeda Y & Narita A (2018)  
920 Structural basis for cofilin binding and actin filament disassembly. *Nat Commun* 9:  
921 1860
- 922 Thompson ME, Heimsath EG, Gauvin TJ, Higgs HN & Kull FJ (2013) FMNL3 FH2-actin  
923 structure gives insight into formin-mediated actin nucleation and elongation. *Nat*  
924 *Struct Mol Biol* 20: 111–8
- 925 Ti S-C & Pollard TD (2011) Purification of Actin from Fission Yeast *Schizosaccharomyces*  
926 *pombe* and Characterization of Functional Differences from Muscle Actin. *J Biol*  
927 *Chem* 286: 5784–5792
- 928 Tinevez J-Y, Perry N, Schindelin J, Hoopes GM, Reynolds GD, Laplantine E, Bednarek SY,  
929 Shorte SL & Eliceiri KW (2017) TrackMate: An open and extensible platform for  
930 single-particle tracking. *Methods San Diego Calif* 115: 80–90
- 931 Urnavicius L, Zhang K, Diamant AG, Motz C, Schlager MA, Yu M, Patel NA, Robinson CV  
932 & Carter AP (2015) The structure of the dynactin complex and its interaction with  
933 dynein. *Science* 347: 1441–6
- 934 Vedula P, Kurosaka S, Leu NA, Wolf YI, Shabalina SA, Wang J, Sterling S, Dong DW &  
935 Kashina A (2017) Diverse functions of homologous actin isoforms are defined by  
936 their nucleotide, rather than their amino acid sequence. *eLife* 6: e31661
- 937 Vorobiev S, Strokopytov B, Drubin DG, Frieden C, Ono S, Condeelis J, Rubenstein PA &  
938 Almo SC (2003) The structure of nonvertebrate actin: implications for the ATP  
939 hydrolytic mechanism. *Proc Natl Acad Sci U S A* 100: 5760–5
- 940 Winn MD, Ballard CC, Cowtan KD, Dodson EJ, Emsley P, Evans PR, Keegan RM, Krissinel  
941 EB, Leslie AG, McCoy A, *et al* (2011) Overview of the CCP4 suite and current  
942 developments. *Acta Crystallogr D Biol Crystallogr* 67: 235–42
- 943 Zhou Z, Dang Y, Zhou M, Li L, Yu C, Fu J, Chen S & Liu Y (2016) Codon usage is an  
944 important determinant of gene expression levels largely through its effects on  
945 transcription. *Proc Natl Acad Sci* 113: E6117–E6125

946

947

## 948 **Abbreviations**

949 FH1-FH2: Formin Homology domain 1- Formin Homology domain 2

950

951 **Figures legends**

952 **Figure 1. Variety of actins selected for this study and analysis strategies. (A)**

953 Simplified phylogenetic tree showing mainly the Dikarya subkingdom and including  
954 the external branches *Homo sapiens* (Hs) and *Arabidopsis thaliana* (At). The Id.  
955 column indicates amino acid sequences percentage identities, ranging from 100%  
956 (green) to 84% (magenta) identity to *S. cerevisiae*'s actin. Squares outlines are solid  
957 or dotted for sequences deriving from existing species or ancestral reconstruction,  
958 respectively. The "coded by" column indicates which coding sequences were  
959 originally used to code genes of interest. Nucleotide sequence identities are ranging  
960 from 100% (blue) to 76% (orange) compared to *S. cerevisiae*'s actin coding  
961 sequence. **(B)** Amino acid sequence of *Saccharomyces cerevisiae* actin. Arrows  
962 denote all the positions that are mutated in at least one of the actin variants tested in  
963 this study. **(C)** Schematic representation of *S. cerevisiae* actin 3D structure (1YAG  
964 (Vorobiev *et al*, 2003)), showing that mutations cover all regions of the protein. Dots  
965 indicate where mutations are located, using a different color code for all actins  
966 studied here. **(D)** Schematic showing the mutagenesis strategies applied in this  
967 study, enabling to question respectively the importance of actin's intron, the  
968 nucleotide sequence, the amino acid sequence, and the effect of expressing  
969 copolymers. Green color indicates whether modifications are brought in the coding  
970 sequence (leading to expression of wild-type Act1 protein (pink) or in the amino acid  
971 sequence (leading to expression of an Act1\* actin ortholog).

972

973 **Figure 2. Effects of silent mutations on actin expression levels, cell viability**

974 **and cytoskeletal organization. (A)** Actin expression levels shown by western

975 blotting for strains expressing *S. cerevisiae*'s actin protein from various coding

976 sequences, with tubulin (Tub1p) as a loading control. **(B)** Quantification of actin  
977 expression levels, showing a decrease when more silent mutations are present. **(C)**  
978 3-fold serial dilutions of yeast strains cultures, grown at 25 °C for 2 days on a YPD  
979 plate. **(D)** Quantification of (C) by measurement of colony area. **(E)** Level of actin  
980 expression as a function of colony area does not show any clear correlation. Rather,  
981 there is an apparent level of actin expression ( $0.25 < \text{expression} < 0.35$ ) below which  
982 growth rates drastically reduce. **(F)** Phalloidin staining depicting F-actin organization.  
983 Images are maximum intensity projections of 3D stacks. Scalebar: 3  $\mu\text{m}$ . **(G)** *In vivo*  
984 actin network deviation indexes, defined to evaluate the patch-cable balance  
985 compared to *S. cerevisiae* haploid cells (value is 0 in *S. cerevisiae*'s cells, 1 when  
986 cells contain only actin patches and -1 when cells contain only cables). **(H)** *In vivo*  
987 actin network deviation indexes as a function of actin expression levels does not  
988 show any clear correlation. Rather, we observe a threshold of actin expression levels  
989 ( $0.25 < \text{expression} < 0.35$ ) below which actin cytoskeleton organization is affected. **(I)**  
990 Polarity indexes, defined to assess whether cell polarity is normal or affected (value  
991 is 1 when all patches of medium to large budded cells are present in the bud, and -1  
992 refers when all patches are in the mother cell. Color code: nucleotide sequences  
993 percentage identities compared to *S. cerevisiae* actin gene, ranging from 100%  
994 (blue) to 75% (orange). Abbreviations: Sc - wild-type *S. cerevisiae* cells, ScNI - *S.*  
995 *cerevisiae* cells where the actin gene has been replaced with the wild-type gene but  
996 without the intron, Sc[X] – *S. cerevisiae* cells where the actin gene has been replaced  
997 with a gene carrying silent mutations based on the sequences from species X (for the  
998 list of species and coding see Table 1 or Figure 1). Statistics: Brown-Forsythe and  
999 Welch ANOVA tests, with Dunnett's T3 multiple comparisons tests. P value style: GP



1000 \* <0.05, \*\* <0.01, \*\*\* <0.001. Error bars indicate standard deviations. Correlation  
1001 coefficients r correspond to Pearson correlation coefficients.

1002

1003 **Figure 3. Effects on cell viability and cytoskeletal organization of swapping**  
1004 **actin for different variants. (A)** Actin expression levels shown by western blotting  
1005 for strains expressing *S. cerevisiae*'s actin or other actins, with tubulin (Tub1p) as a  
1006 loading control. **(B)** Quantification of actin expression levels showing varying levels of  
1007 expression that do not correlate with evolutionary relationship. **(C)** 3-fold serial  
1008 dilutions of different yeast strain cultures grown at 25°C for 2 days on a YPD plate.  
1009 **(D)** Quantification of (C) by measurement of the colony area. **(E)** Colony area as a  
1010 function of percentage identity of the actin variant, showing clear correlation. **(F)**  
1011 Phalloidin staining of F-actin organization. Images are maximum intensity projections  
1012 of 3D stacks. Scalebar: 3  $\mu$ m **(G)** *In vivo* actin network deviation indexes. **(H)** Polarity  
1013 indexes. **(I)** Colony area as a function of the *in vivo* actin network deviation index. **(J)**  
1014 Effect of CK-666 (150  $\mu$ M) on the organization of the actin cytoskeleton. Cells were  
1015 stained with phalloidin after 30 min incubation with CK-666. Images are maximum  
1016 intensity projections of 3D stacks. **(K)** Quantification of actin patch resistance to CK-  
1017 666 treatment. Bar graphs represent the percentage of cells with a given number of  
1018 visible actin patches after CK-666 treatment. Color code: nucleotide sequences  
1019 percentage identities compared to *S. cerevisiae* actin, ranging from 100% (blue) to  
1020 84% (orange). Abbreviations: Sc - wild-type *S. cerevisiae* cells, ScNI - *S. cerevisiae*  
1021 cells where the actin gene has been replaced with the wild-type gene but without the  
1022 intron, the other abbreviations correspond to cells expressing actins from other  
1023 species (for the list of species see Table 1 or Figure 1). Statistics: Brown-Forsythe  
1024 and Welch ANOVA tests, with Dunnett's T3 multiple comparisons tests. P value style:

1025 GP \* <0.05, \*\* <0.01, \*\*\* <0.001. Error bars indicate standard deviations. Correlation  
1026 coefficients r correspond to Pearson correlation coefficients.

1027

1028 **Figure 4. *In vitro* reconstitution of branched- and linear- actin networks**

1029 **assembly from purified actins.** Standard conditions include Las17- (branched) and

1030 Bni1- (linear) coated beads, 8  $\mu$ M F-actin (1% Alexa-568-labeled), 15  $\mu$ M profilin, 1

1031  $\mu$ M capping protein, 500 nM Arp2/3 complex and 600 nM ADF/cofilin. Snapshots of

1032 representative actin networks were taken after 30 min. Scalebars: 6  $\mu$ m. **(A)** (Top)

1033 Snapshots of actin networks assembled from three different actins sources: Act1,

1034 Act\_N2 and Act\_Ca. (Bottom left) Quantification of actin fluorescence on beads.

1035 (Bottom right) *In vitro* actin network deviation indexes. **(B)** (Left) Snapshots of

1036 representative actin networks assembled in the presence of 600 nM Alexa-488-

1037 labeled ADF/cofilin (replacement of unlabeled ADF/cofilin). **(C)** Snapshots of

1038 representative actin networks assembled in the presence 1  $\mu$ M Alexa 488-

1039 tropomyosin. For all microscopy images, contrasts were adapted for images of

1040 branched- and linear- actin networks separately as their brightness is different.

1041 Please refer to quantifications on the left to compare levels of intensity.

1042 Abbreviations: Sc – purified *S. cerevisiae* actin, N2 – purified Node 2 actin, Ca –

1043 purified *C. albicans* actin (for more details see Table 1, Figure 1 and Figure S1 B-C).

1044

1045 **Figure 5. ABPs interfaces with actin. (A)** Sequence alignment of three actins

1046 (Act\_Sc, Act\_N2 and Act\_Ca; deep blue indicates conserved residues, light blue and

1047 white indicates non-conserved), indicating contacts between proteins used in the

1048 biomimetic assay (with Arp2/3 complex at the mother filament interface (M), with

1049 Arp2/3 complex at the daughter filaments interface (D), with tropomyosin (T), with

1050 WASP's WH2 (W), with formin (F), with profilin (P), with ADF/cofilin (C), with capping  
1051 protein (Z), at the protofilament interface (\*) and laterally (^). **(B)** Schematic  
1052 representation of actin 3D structure (1YAG (Vorobiev *et al*, 2003)). Color dots  
1053 correspond to positions where Act\_Sc has different residues compared to Act\_N2  
1054 (red) and Act\_Ca (blue). Purple dots correspond to positions where both Act\_N2 and  
1055 Act\_Ca have different residues compared to Act\_Sc. Abbreviations: Sc – *S.*  
1056 *cerevisiae* actin, N2 – Node 2 actin, Ca – *C. albicans* actin (for more details see  
1057 Table 1, Figure 1 and Figure S1 B-C).

1058

1059 **Figure 6. Effect of a dual expression of actins on cell viability and cytoskeletal**  
1060 **organization. (A)** Schematic of the experiment performed in a diploid yeast  
1061 background. **(B)** 3-fold serial dilutions of diploid yeast strains cultures, grown at 25°C  
1062 for 2 days on a YPD plate. Act\_N2/Act\_Ca and Act\_Ca/Act\_N2 express the same  
1063 actins but markers used for selection are exchanged. **(C)** Quantification of (B) by  
1064 measurement of colony area. **(D)** Phalloidin staining depicting F-actin organization.  
1065 Images are maximum intensity projections of 3D stacks. **(E)** *In vivo* actin network  
1066 deviation indexes. **(F)** Polarity Indexes. **(G)** Effect of CK-666 (75 µM) on the  
1067 organization of the actin cytoskeleton. Cells were stained with phalloidin after 30 min  
1068 incubation with CK-666. Images are maximum intensity projections of 3D stacks. **(H)**  
1069 *In vivo* actin network deviation indexes of cells treated with DMSO or CK-666.  
1070 Scalebars: 3 µm. Abbreviations: Sc/Sc – wild-type diploid *S. cerevisiae* cells, N2/N2 –  
1071 diploid *S. cerevisiae* cells expressing only N2 actin, Ca/Ca – diploid *S. cerevisiae*  
1072 cells expressing only *C. albicans* actin, N2/Ca and Ca/N2 – diploid *S. cerevisiae* cells  
1073 expressing N2 actin and *C. albicans* actin at the same time (for more details see  
1074 Table 1, Figure 1 and Figure S1 B-C). Statistics: Brown-Forsythe and Welch ANOVA

1075 tests, with Dunnett's T3 multiple comparisons tests. P value style: GP \* <0.05, \*\*  
1076 <0.01, \*\*\* <0.001. Error bars indicate standard deviations.

1077

1078 **Figure 7. Schematic model of the differences between a cell expressing one or**  
1079 **two actins to perform two cellular functions. (Top)** A model of the molecular  
1080 mechanisms by which two actin isoforms may segregate to different actin networks.  
1081 On the left, a system carrying wild-type actin is able to generate both the branched-  
1082 and linear-networks. On the two central panels, defective interactions of an actin  
1083 isoform with one or several ABPs, affect branched- or linear-network assembly. On  
1084 the right, combining these two actin variants in one cell should trigger a natural  
1085 segregation of actins and rescues the wild type actin organization. **(Bottom)** Effect of  
1086 perturbing an actin assembly pathway for cells using one or two actin variants. On  
1087 the left, when one actin is shared for two actin functions, the inhibition of one actin  
1088 assembly pathway (for example branched-networks with CK-666) leads to a  
1089 reinforcement of the other actin assembly pathway. On the right, when two actin  
1090 variants are used for two different actin functions, this effect is limited as both actin  
1091 networks assemble more independently. In other words, having a system with two  
1092 actin variants can buffer against the addition of the drug.

1093

1094

## 1095 **Supplementary Figures legends**

1096 **Figure S1, related to Figure 1. Selection of actins strategy. (A)** Complete  
1097 phylogenetic tree that was used as input for FastML ancestral reconstruction analysis  
1098 (Ashkenazy *et al*, 2012) **(B)** Posterior probability for the ancestral sequences used in  
1099 this study, showing high confidence in the predicted sequences. **(C)** (Top) Multiple

1100 sequence alignment for all actin sequences used in this study. (Bottom) Schematic  
1101 representations of actin 3D structure (1YAG, (Vorobiev *et al*, 2003)), with position of  
1102 amino acid differences shown with colored dots for each actin. **(D)** Schematic  
1103 representation of mutagenesis strategy by homologous recombination used in this  
1104 study (see also Methods).

1105

1106 **Figure S2, related to Figure 2. Effect of removing *S. cerevisiae*'s Act1 intron**  
1107 **and of silent mutations in the actin gene. (A)** 3-fold serial dilutions of different  
1108 yeast strains cultures grown at 25°C for 2 days on a YPD plate. **(B)** Quantification of  
1109 (A) by measurement of colony area. **(C)** Actin expression levels shown by western  
1110 blotting, with tubulin (Tub1p) as a loading control. **(D)** Quantification of actin  
1111 expression levels. **(E)** Phalloidin stain depicting F-actin organization. Images are  
1112 maximum intensity projections of 3D stacks. Scalebar: 3  $\mu$ m. **(F)** *In vivo* actin network  
1113 deviation indexes. **(G)** Polarity indexes. **(H)** Multiple sequence alignment of the  
1114 beginning of the nucleotide sequence (top) and the beginning of the amino acid  
1115 sequence (bottom), as an example of how we used coding sequences from other  
1116 organisms that we modified minimally so that the final product remained *S. cerevisiae*  
1117 actin. **(I)** Actin expression levels as a function of nucleotide conservation, showing  
1118 that increased number of silent mutations lowers actin expression. **(J)** Colony area as  
1119 a function of nucleotide identity, showing a threshold of nucleotide conservation  
1120 (78%<id<82%) below which growth rates drastically reduce. Abbreviations: Sc - wild-  
1121 type *S. cerevisiae* cells, ScI - *S. cerevisiae* cells where the actin gene has been  
1122 replaced with the full construct carrying the wild-type gene, ScNI - *S. cerevisiae* cells  
1123 where the actin gene has been replaced with the wild-type gene but without the  
1124 intron.

1125

1126 **Figure S3. C4 actin antibody has a higher affinity for rabbit muscle actin than**  
1127 **for *S. cerevisiae* actin. (A)** The binding site of the C4 antibody, indicated as  
1128 “C4\_Epitope”, is found on Act\_Hs and on rabbit muscle actin. In all other actin  
1129 variants used in this study, the sequence varies of one amino acid (called here  
1130 “Mutated\_Epitope”) but is recognized by C4 antibody. **(B)** Western blot with  
1131 equivalent amounts of purified yeast actin and rabbit actin. The amount of protein  
1132 was revealed by two methods: Ponceau staining and chemiluminescence. The  
1133 chemiluminescence signal corresponds to the one produced by the secondary  
1134 antibody after incubation with a primary antibody anti-actin C4 and a secondary  
1135 antibody conjugated with HRP. **(C)** Quantification of (B) indicates that  
1136 immunolabeling of rabbit muscle actin with C4 antibody leads to a 1.48-fold more  
1137 intense signal than immunolabeling of *S. cerevisiae* actin.

1138

1139

## 1140 **Tables legends**

1141 **Table 1. Details of actin variants.** This table contains the information corresponding  
1142 to all actins used in this study. Name corresponds to the names used in the  
1143 manuscript. Species corresponds to species where the amino acid sequence is  
1144 normally expressed. Nucleotide corresponds to the coding of the gene regardless of  
1145 the translation product. Protein ref. is the PDB reference to access to all the  
1146 information about that actin. Amino acid (green-magenta) and nucleotide (blue-  
1147 orange) identities are at the end of the table. Positive is similar to identity but instead  
1148 of considering all mutations in the protein, it considers only the non-conservative

1149 substitutions, meaning the changes in amino acids that have different chemical  
1150 properties.

1151

1152 **Table 2. ABPs interfaces with actin, identified in CONTACT** (Winn *et al*, 2011).

1153 Detail of the mutations in Act\_N2 (red) and Act\_Ca (blue) compared to Act\_Sc

1154 (black) and the interaction of each position with ABPs. Abbreviations: Sc –*S.*

1155 *cerevisiae* actin, N2 – Node 2 actin, Ca – *C. albicans* actin (for more details see

1156 Table 1, Figure 1 and Figure S1 B-C).

1157

1158

1159 **Supplementary Tables legends**

1160 **Table S1. Complete list of all actins used for the ancestral sequence**

1161 **reconstruction using FastML.**

1162

1163 **Table S2. List of plasmids used in this study.** All plasmids were done in a pGEX-

1164 4T1 backbone.

1165

1166 **Table S3. List of yeast strains in this study.**

1167

Figure 1

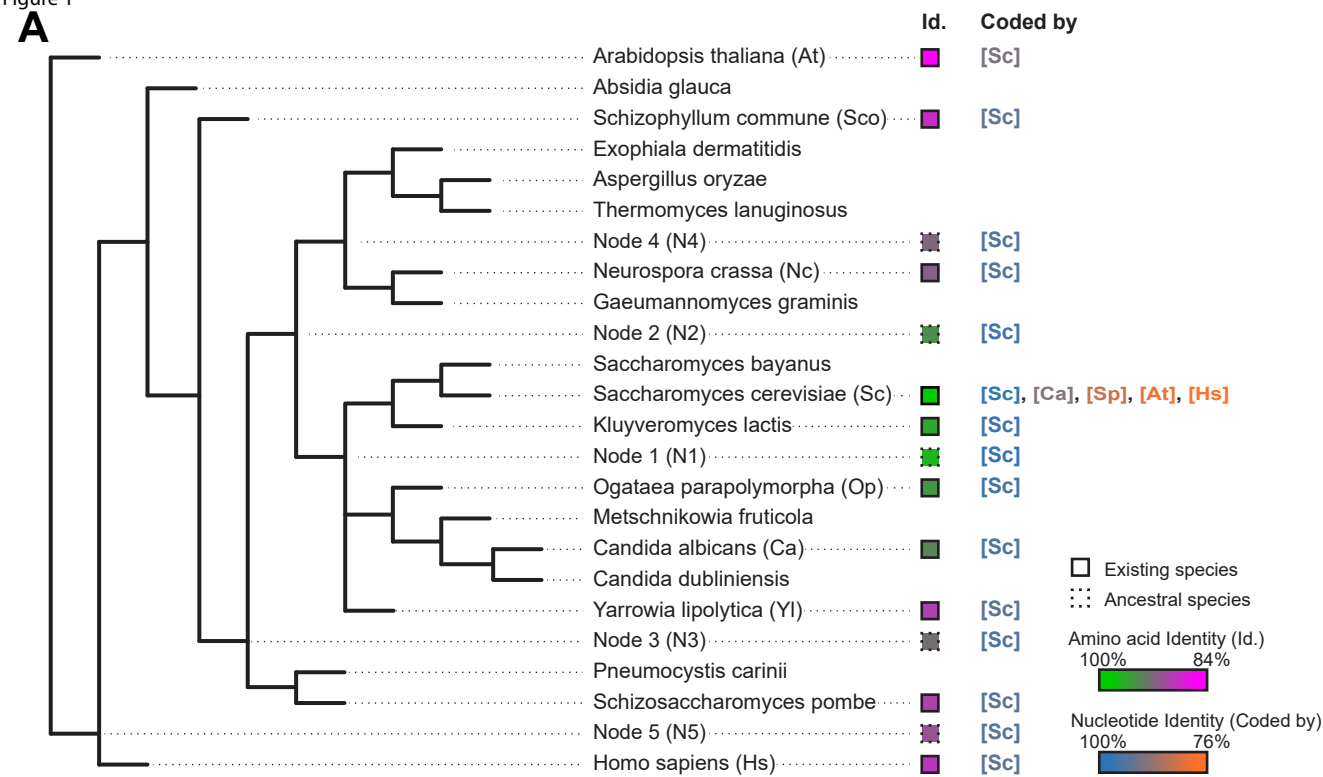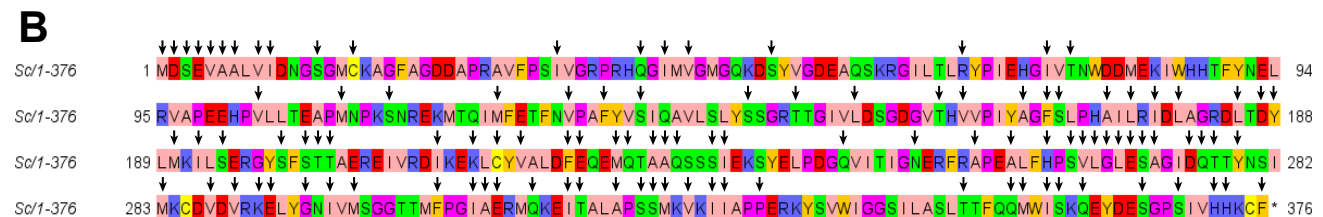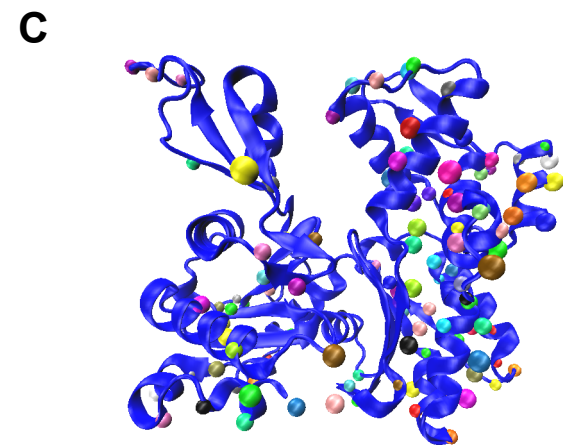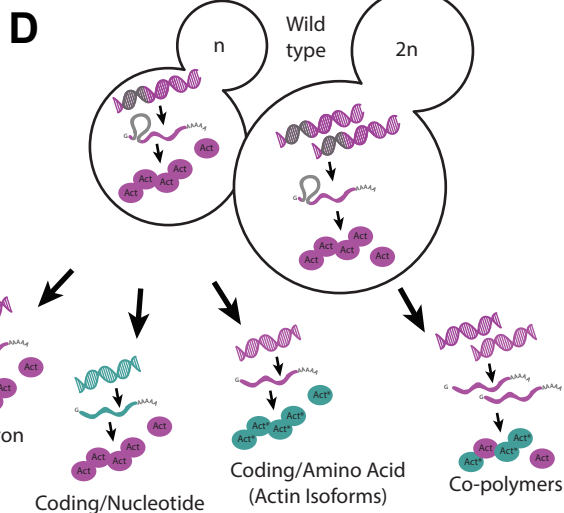



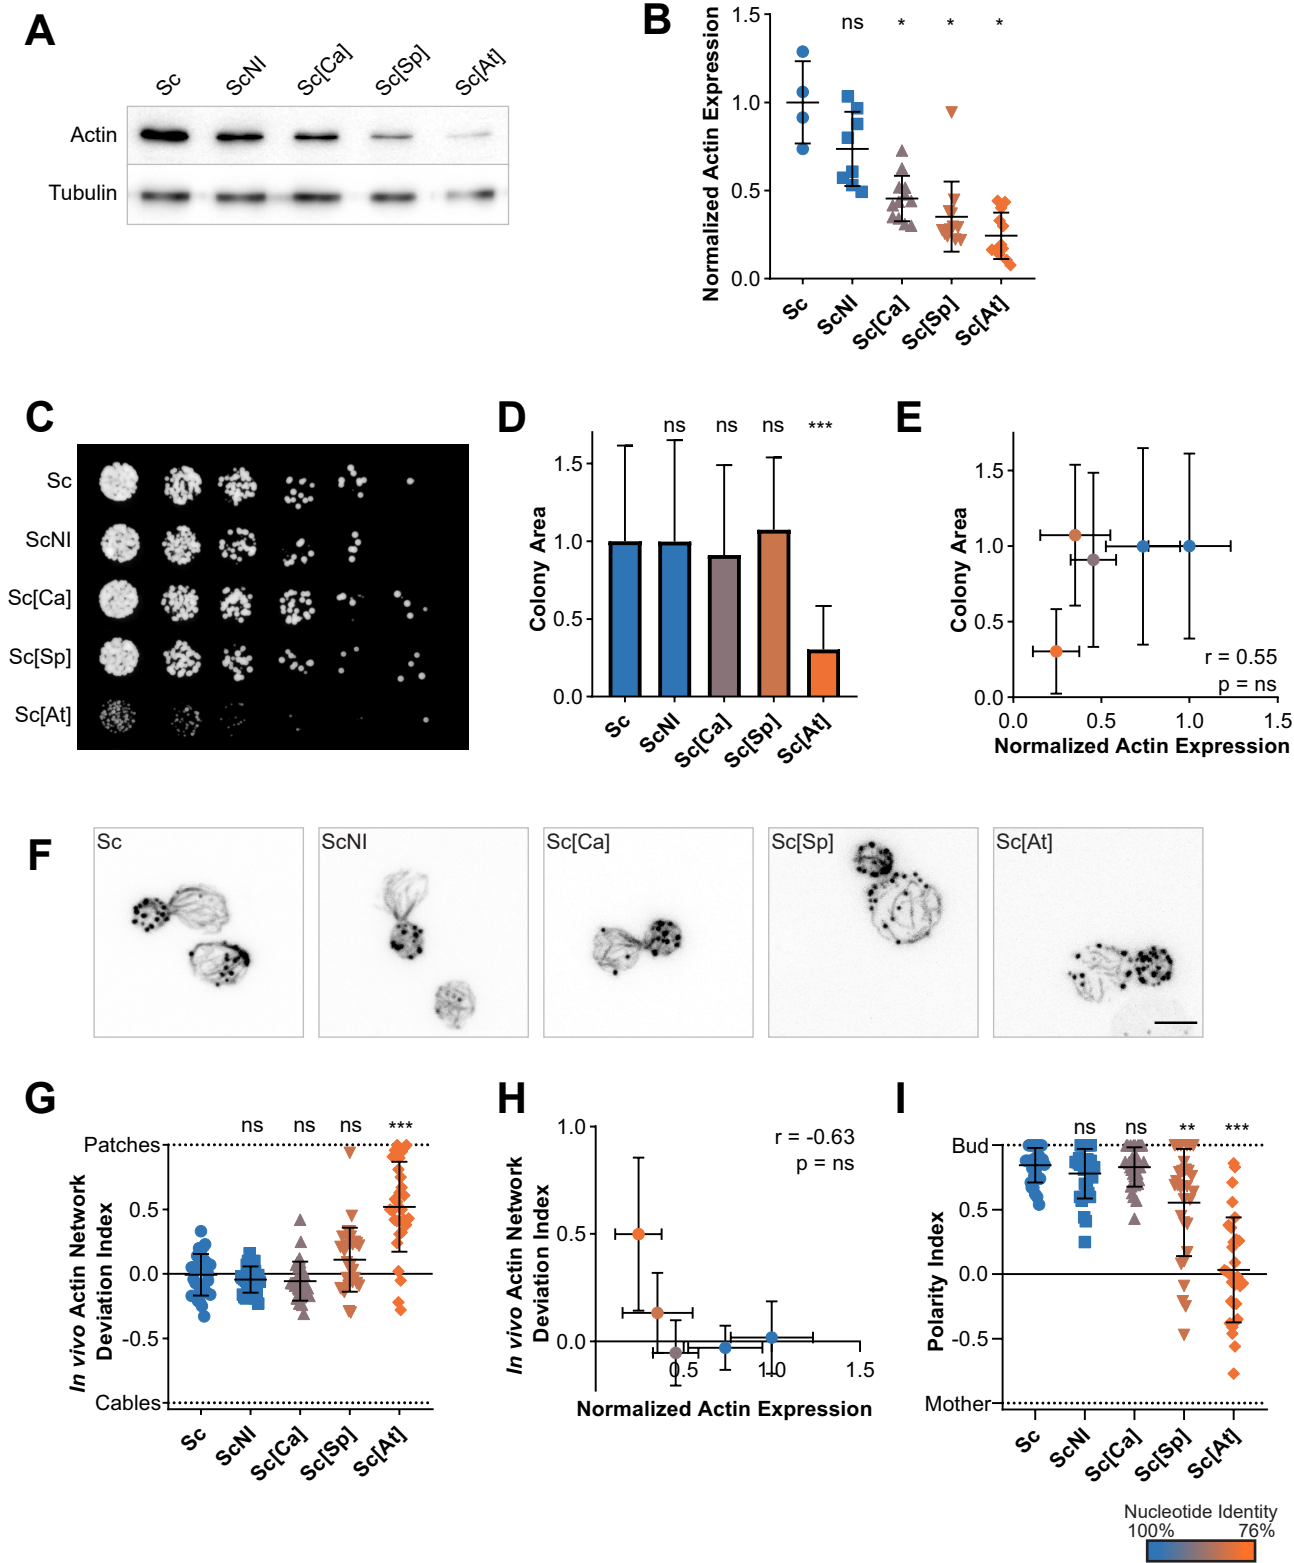

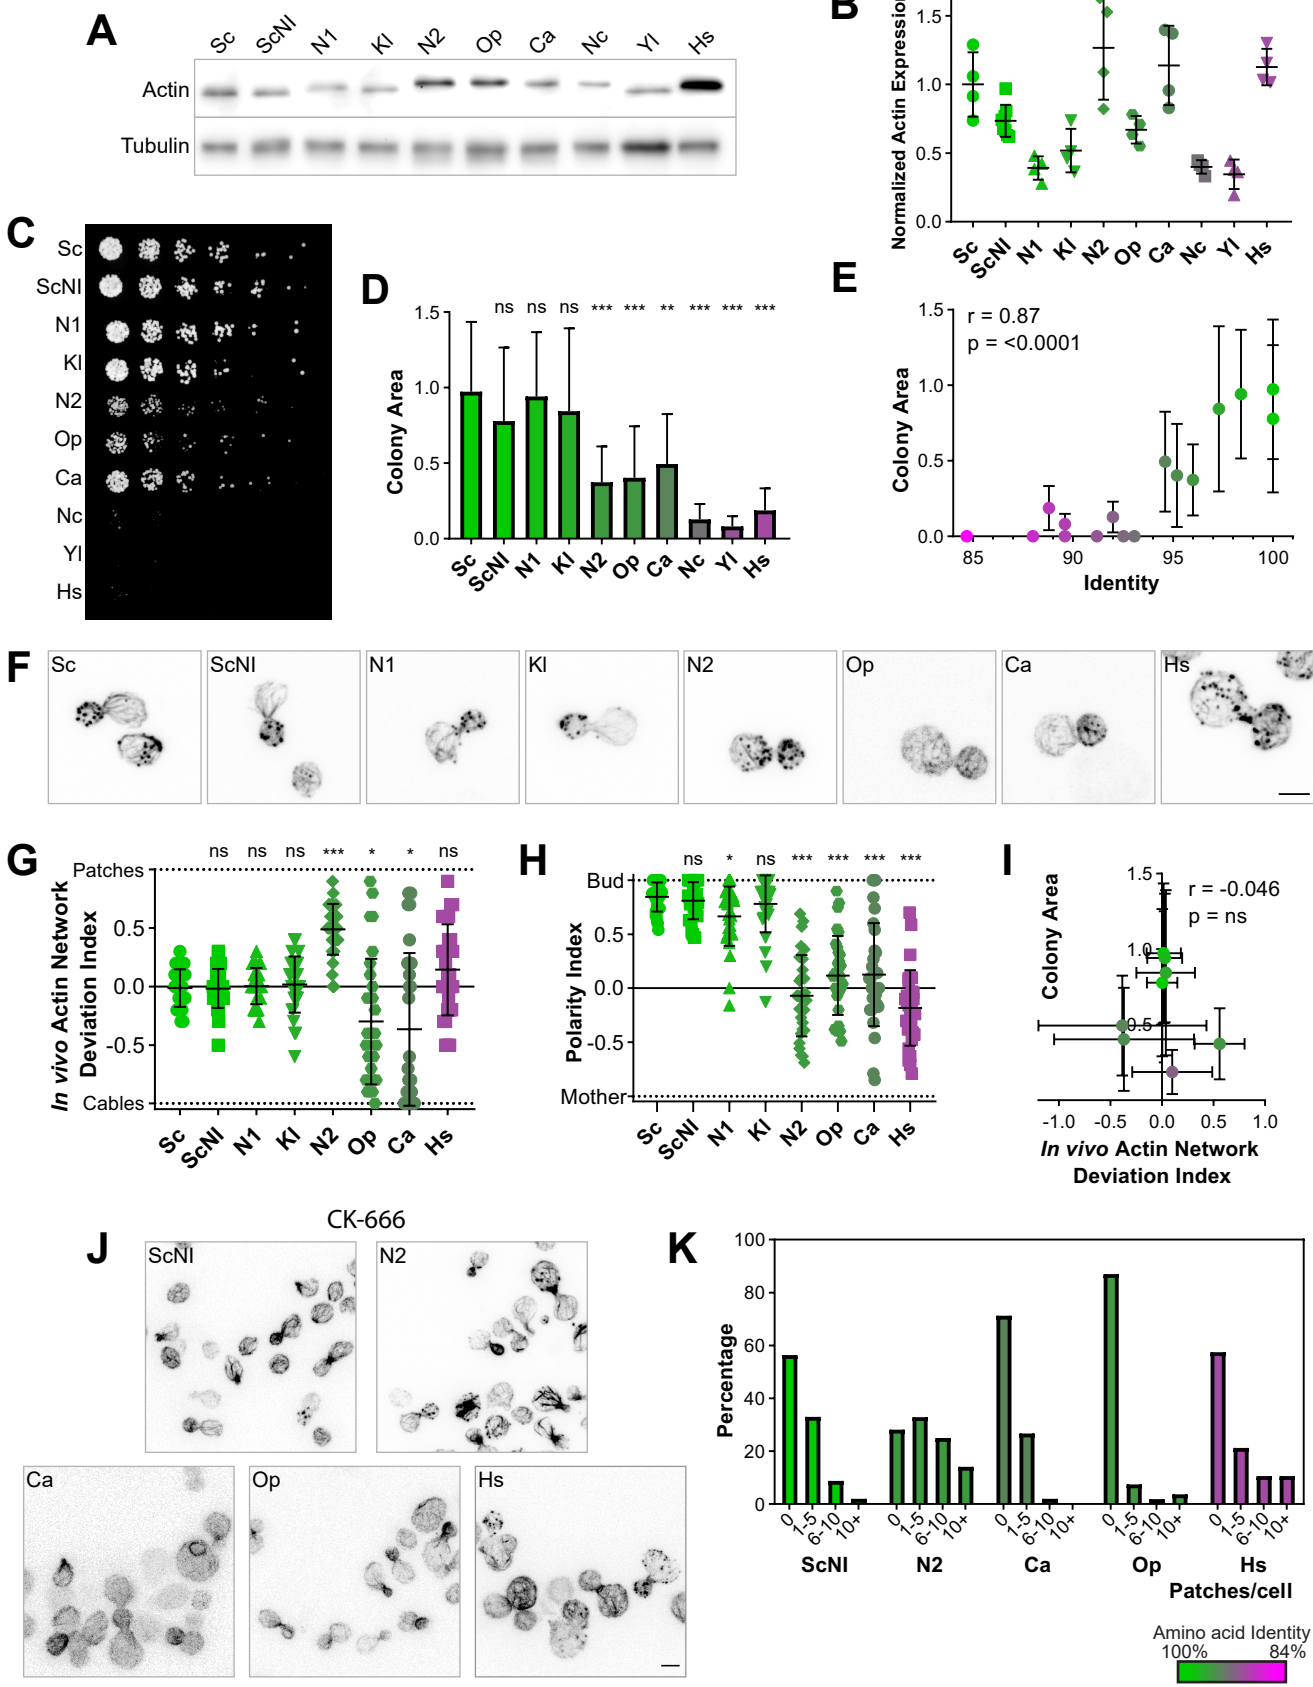

Figure 4

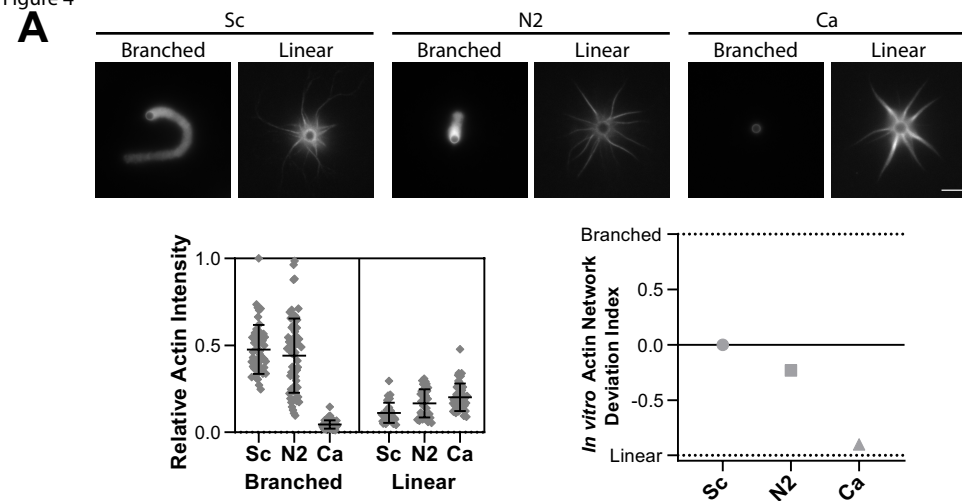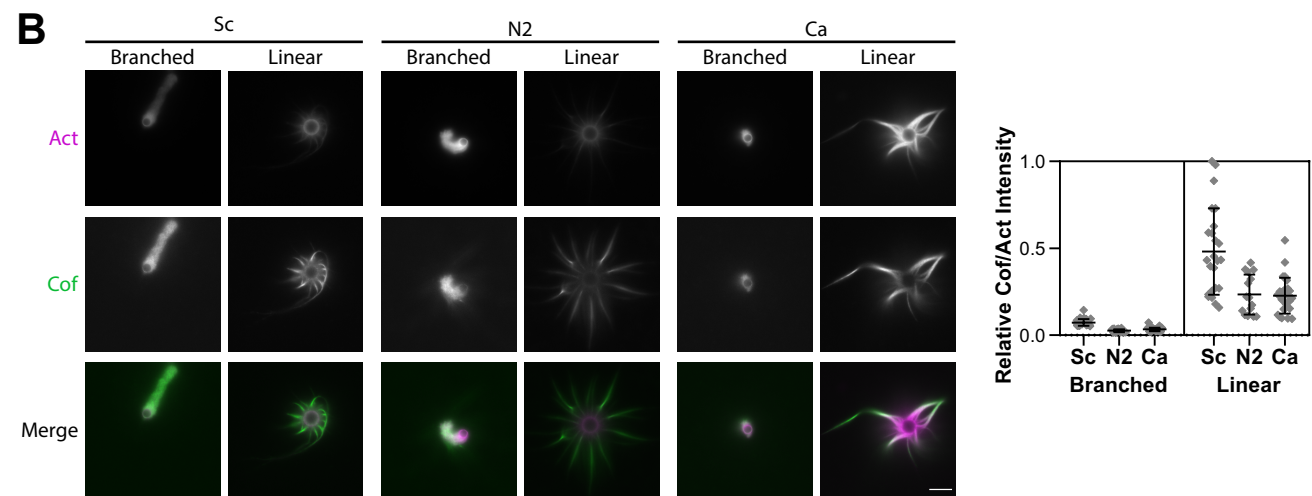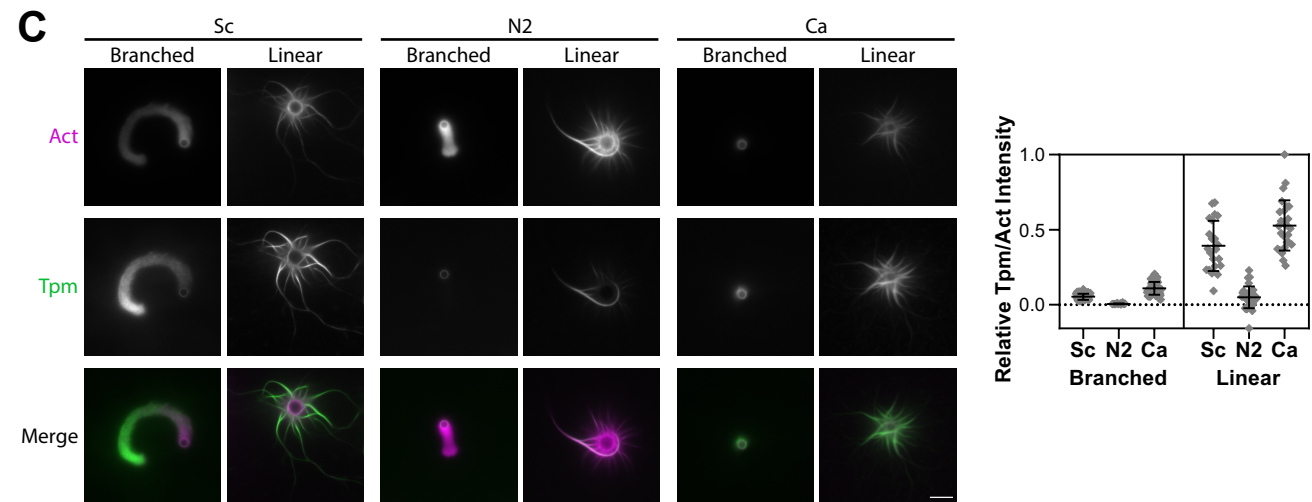

Figure 5

**A**

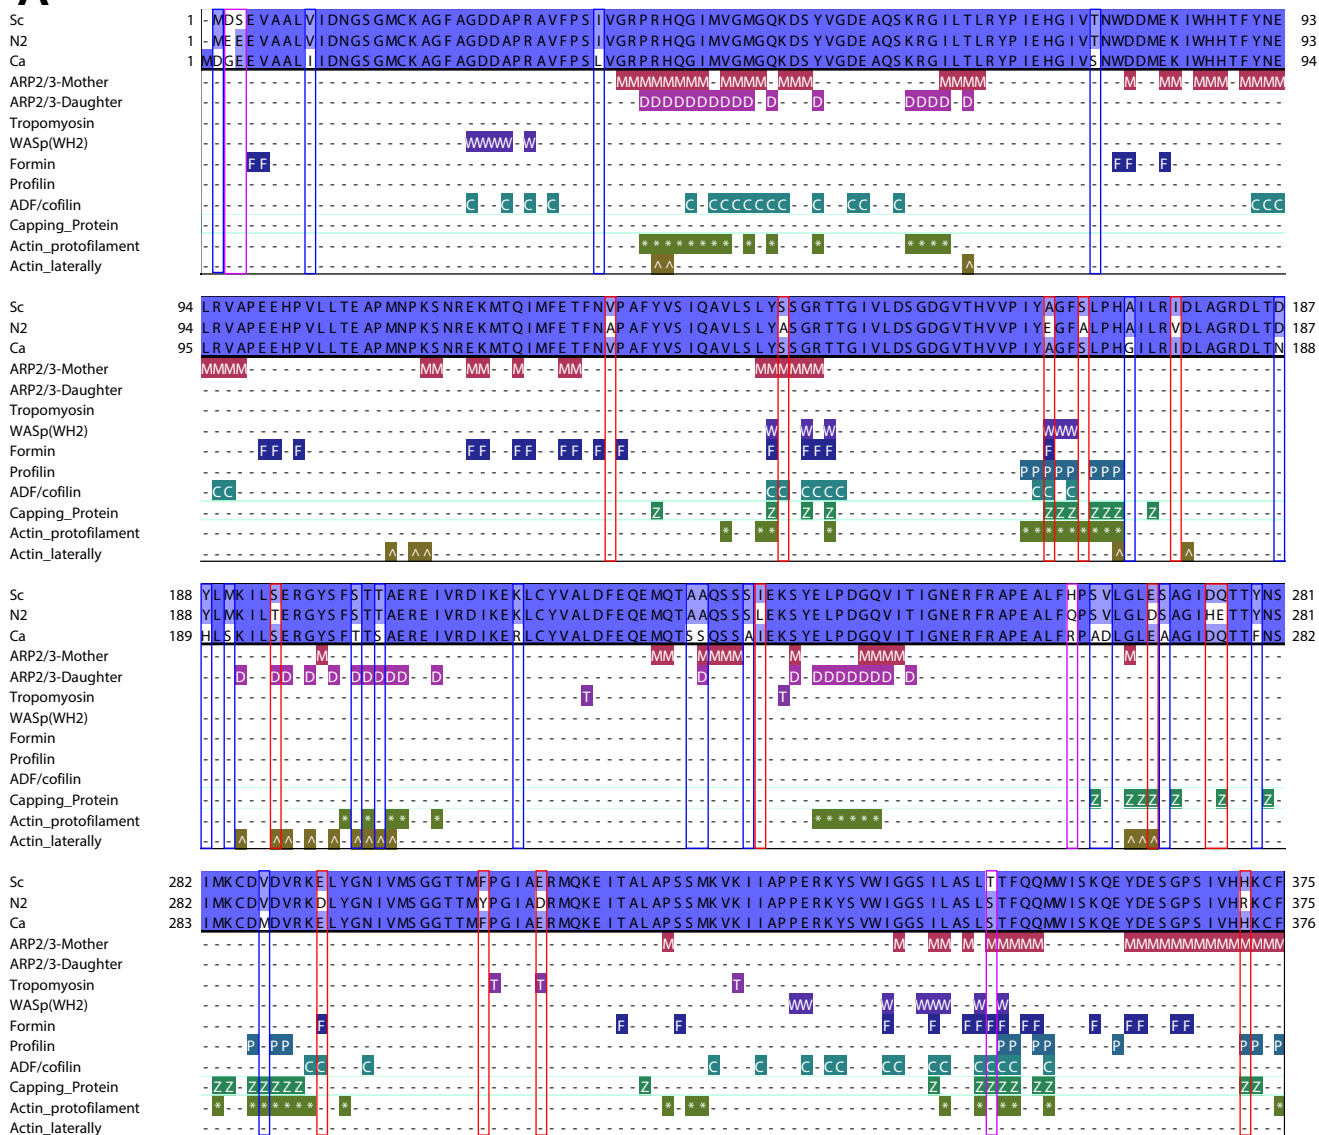

**B**

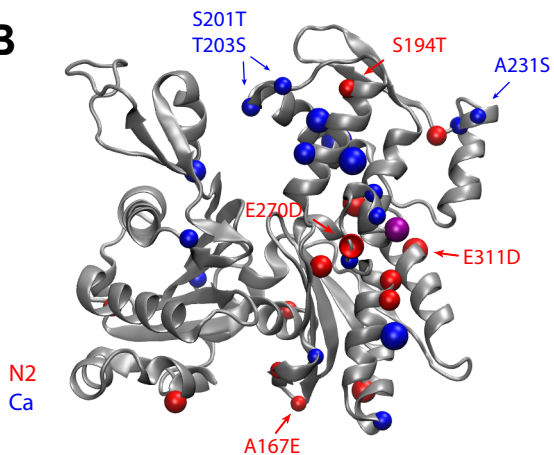

Figure 6

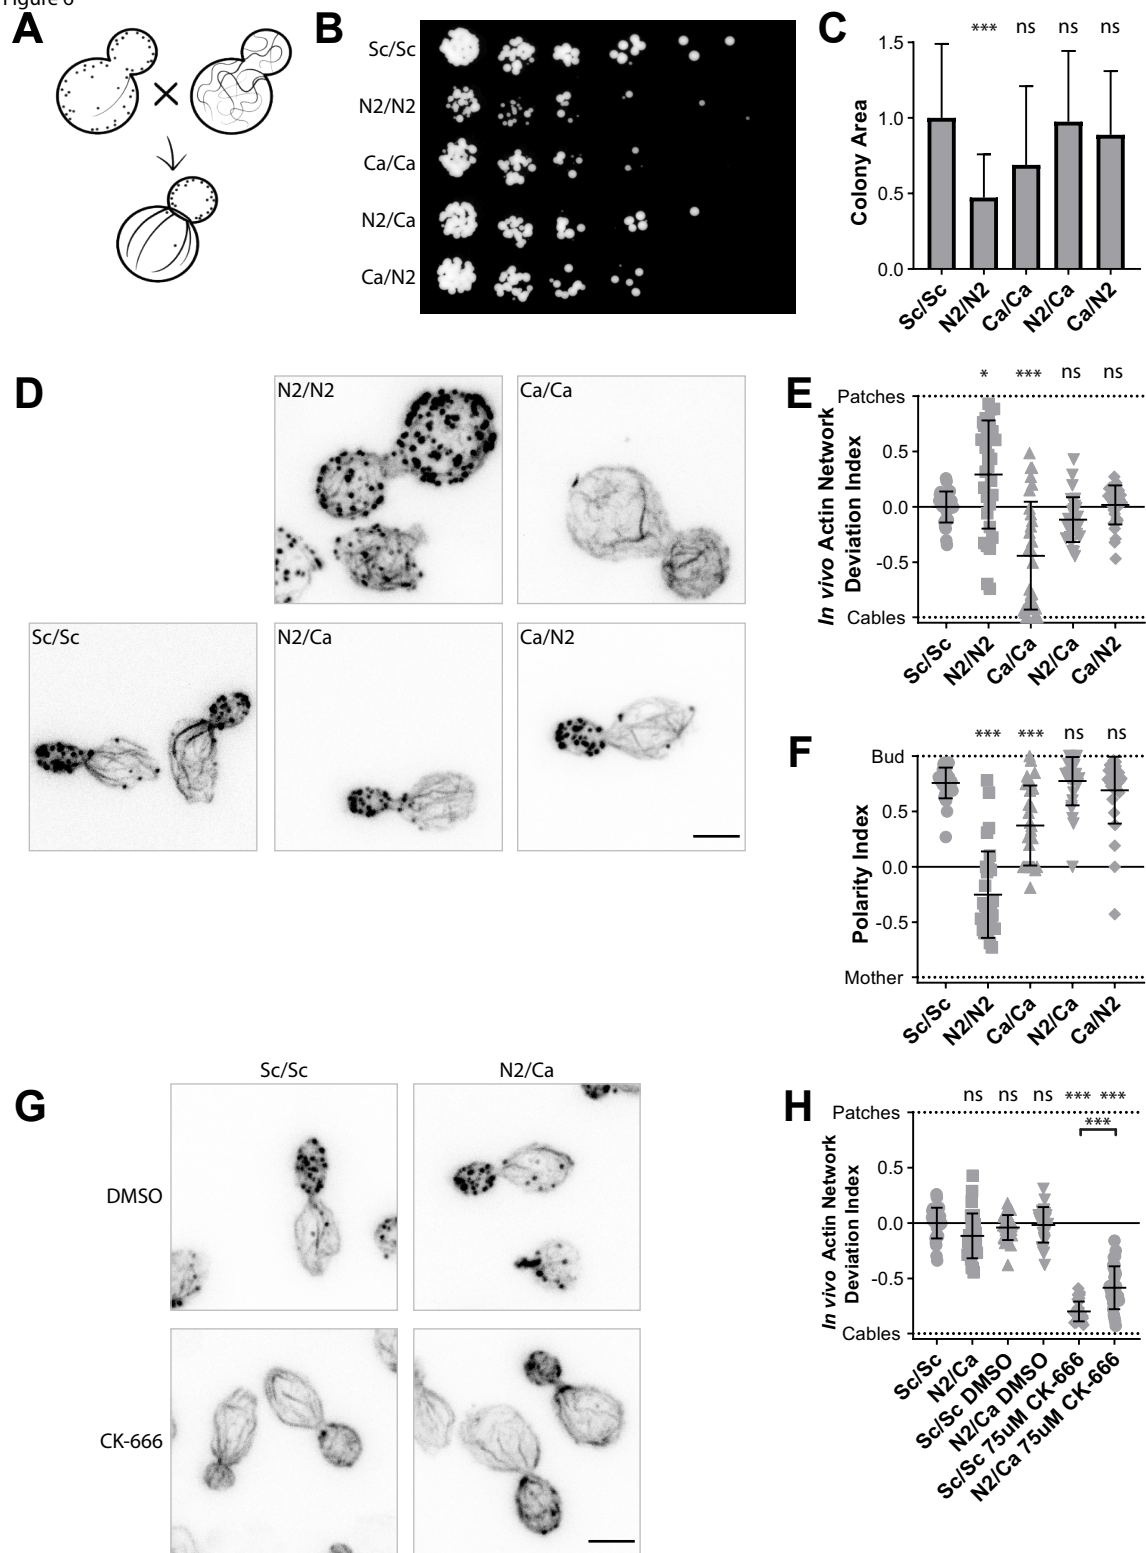

Figure 7

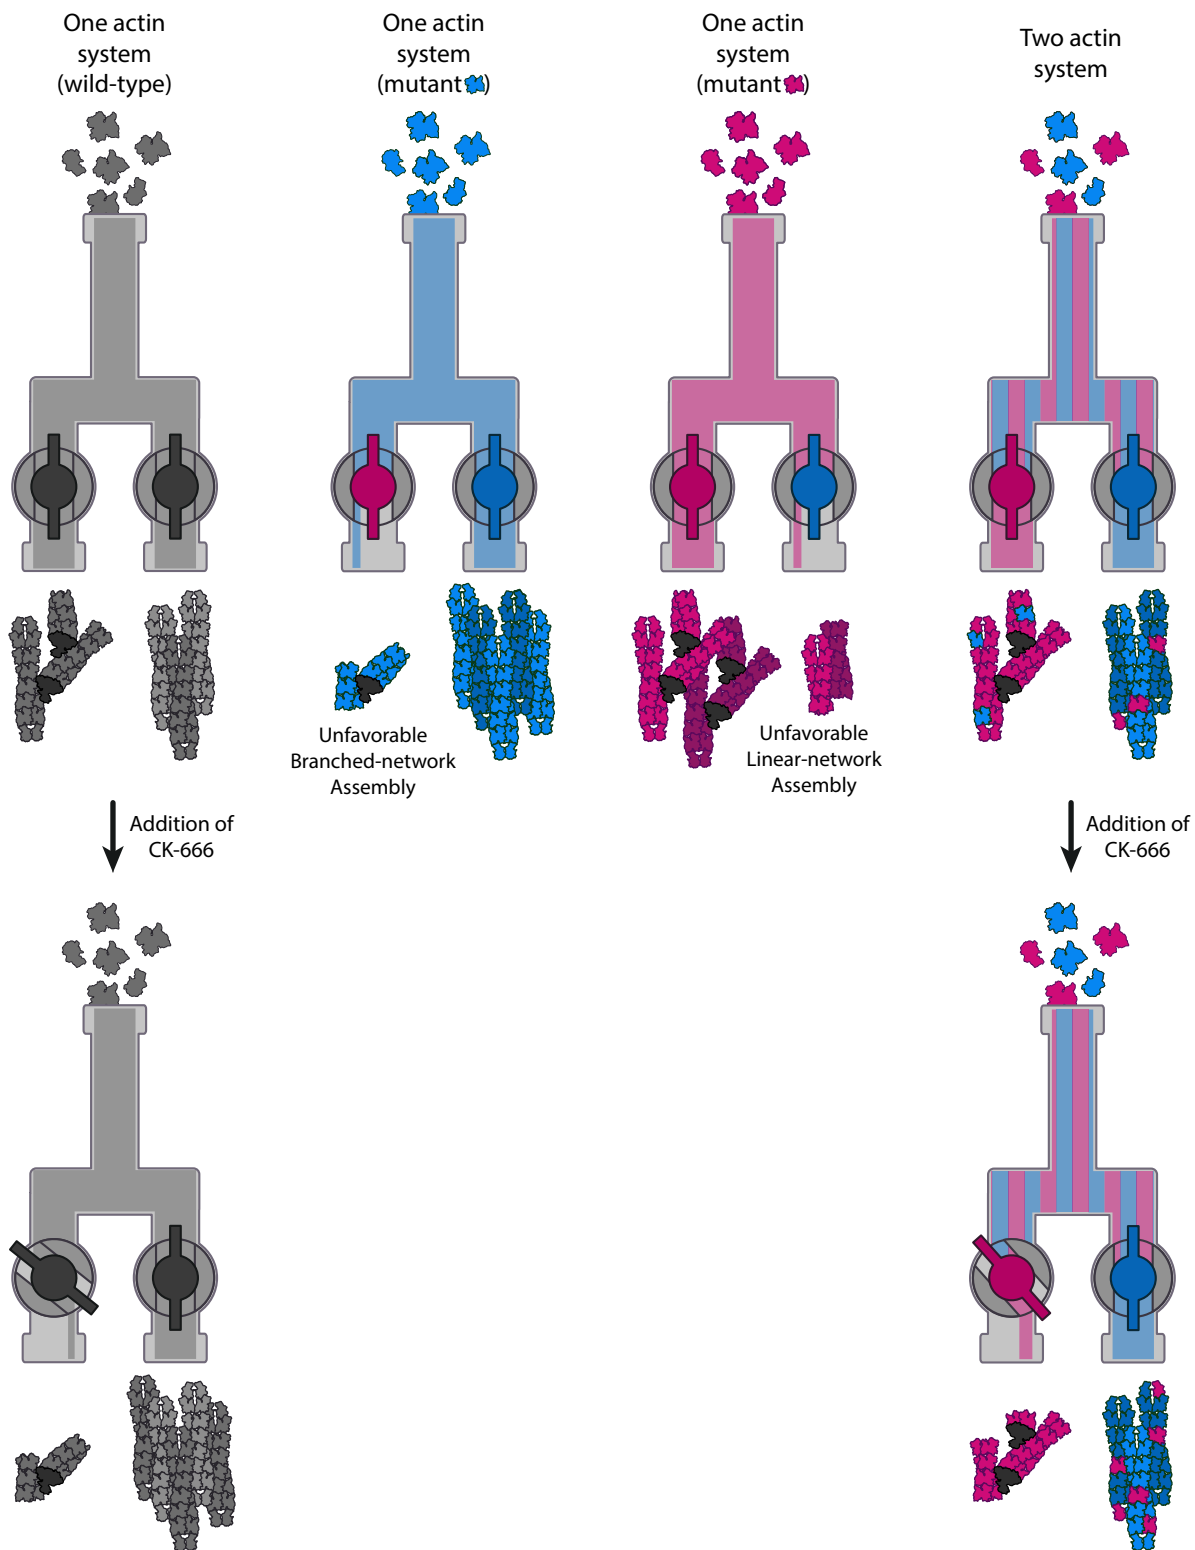

Table 1.

| Name   | Species                          | Coded by                         | UniProt Entry | Amino acid identity | Positive | Nucleotide identity |
|--------|----------------------------------|----------------------------------|---------------|---------------------|----------|---------------------|
| Sc     | <i>Saccharomyces cerevisiae</i>  | <i>Saccharomyces cerevisiae</i>  | P60010        | 100.0               | 100.0    | 100                 |
| Sc[Ca] | <i>Saccharomyces cerevisiae</i>  | <i>Candida albicans</i>          | P60010        | 100.0               | 100.0    | 89.8                |
| Sc[Sp] | <i>Saccharomyces cerevisiae</i>  | <i>Schizosaccharomyces pombe</i> | P60010        | 100.0               | 100.0    | 82.18               |
| Sc[At] | <i>Saccharomyces cerevisiae</i>  | <i>Arabidopsis thaliana</i>      | P60010        | 100.0               | 100.0    | 77.93               |
| Sc[Hs] | <i>Saccharomyces cerevisiae</i>  | <i>Homo sapiens</i>              | P60010        | 100.0               | 100.0    | 75.98               |
| N26    | Ancestral reconstruction         | <i>Saccharomyces cerevisiae</i>  | -             | 98.4                | 99.5     | 99.29               |
| Kl     | <i>Kluyveromyces lactis</i>      | <i>Saccharomyces cerevisiae</i>  | P17128        | 97.3                | 99.2     | 98.49               |
| N19    | Ancestral reconstruction         | <i>Saccharomyces cerevisiae</i>  | -             | 96.0                | 98.7     | 97.87               |
| Op     | <i>Ogataea parapolyomorpha</i>   | <i>Saccharomyces cerevisiae</i>  | O74258        | 95.2                | 98.7     | 97.96               |
| Ca     | <i>Candida albicans</i>          | <i>Saccharomyces cerevisiae</i>  | P14235        | 94.6                | 98.1     | 96.9                |
| N18    | Ancestral reconstruction         | <i>Saccharomyces cerevisiae</i>  | -             | 93.1                | 98.4     | 96.81               |
| N20    | Ancestral reconstruction         | <i>Saccharomyces cerevisiae</i>  | -             | 92.5                | 97.9     | 96.45               |
| Nc     | <i>Neurospora crassa</i>         | <i>Saccharomyces cerevisiae</i>  | P78711        | 92.0                | 97.9     | 96.01               |
| N10    | Ancestral reconstruction         | <i>Saccharomyces cerevisiae</i>  | -             | 91.2                | 97.6     | 95.83               |
| Yl     | <i>Yarrowia lipolytica</i>       | <i>Saccharomyces cerevisiae</i>  | Q9UVF3        | 89.6                | 96.8     | 95.39               |
| Sp     | <i>Schizosaccharomyces pombe</i> | <i>Saccharomyces cerevisiae</i>  | P10989        | 89.6                | 96.3     | 95.04               |
| Hs     | <i>Homo sapiens</i>              | <i>Saccharomyces cerevisiae</i>  | P60709        | 88.8                | 96.3     | 95.04               |
| Sco    | <i>Schizophyllum commune</i>     | <i>Saccharomyces cerevisiae</i>  | Q9Y702        | 88.0                | 96.3     | 94.41               |
| At     | <i>Arabidopsis thaliana</i>      | <i>Saccharomyces cerevisiae</i>  | Q96293        | 84.7                | 94.9     | 91.31               |

Table 2.

| <i>Saccharomyces cerevisiae</i> | Node 2 | <i>Candida albicans</i> | Actin Proto | Actin Lateral | Capping Protein | Profilin | Cofilin | Arp2/3 Daughter | Arp2/3 Mother | Formin | WH2 | Tpm |
|---------------------------------|--------|-------------------------|-------------|---------------|-----------------|----------|---------|-----------------|---------------|--------|-----|-----|
| Ser144                          | Ala144 | Ser145                  |             |               |                 |          | N2      |                 | N2            |        |     |     |
| Ala167                          | Glu167 | Ala168                  | N2          |               | N2              | N2       | N2      |                 |               | N2     | N2  |     |
| Ser170                          | Ala170 | Ser170                  | N2          |               |                 |          |         |                 |               |        |     |     |
| Ser194                          | Thr194 | Ser195                  |             | N2            |                 |          |         | N2              |               |        |     |     |
| Ser201                          | Ser201 | Thr202                  |             | Ca            |                 |          |         | Ca              |               |        |     |     |
| Thr203                          | Thr203 | Ser204                  |             | Ca            |                 |          |         | Ca              |               |        |     |     |
| Ala232                          | Ala232 | Ser234                  |             |               |                 |          |         | Ca              | Ca            |        |     |     |
| Ser265                          | Ser265 | Ala266                  |             |               | Ca              |          |         |                 |               |        |     |     |
| Glu270                          | Asp270 | Glu271                  |             | N2            | N2              |          |         |                 |               |        |     |     |
| Gln276                          | Glu276 | Gln277                  |             |               | N2              |          |         |                 |               |        |     |     |
| Val287                          | Val287 | Met288                  | Ca          |               | Ca              |          |         |                 |               |        |     |     |
| Glu292                          | Asp292 | Glu293                  |             |               |                 |          | N2      |                 |               | N2     |     |     |
| Glu311                          | Asp311 | Glu312                  |             |               |                 |          |         |                 |               |        |     | N2  |
| Thr351                          | Ser351 | Ser315                  |             |               | N2/Ca           |          | N2/Ca   |                 | N2/Ca         | N2/Ca  |     |     |
| His372                          | Arg372 | His373                  |             |               | N2              | N2       |         |                 | N2            |        |     |     |
